# Supplementary material for: Fetuin-A is a HIF target that safeguards tissue integrity during hypoxic stress
Source: PubMed Central journal article supplement (PMC7822914; doi:10.1038/s41467-020-20832-7), 2021-01-22
Supplement: 41467_2020_20832_MOESM1_ESM.pdf [file 41467_2020_20832_MOESM1_ESM.pdf]

## Supplementary information for

### Fetuin-A is a HIF target that safeguards tissue integrity during hypoxic stress

Authors and affiliations:

**Stefan Rudloff<sup>1,2</sup>, Mathilde Janot<sup>1,2</sup>, Stephane Rodriguez<sup>1,2,4</sup>, Kevin Dessalle<sup>1,2</sup>, Willi Jahnen-Dechent<sup>3</sup> and Uyen Huynh-Do<sup>1,2\*</sup>**

<sup>1</sup> Department of Nephrology and Hypertension, Bern University Hospital, Freiburgstrasse 15, CH-3010 Bern, Switzerland

<sup>2</sup> Department of Biomedical Research, University of Bern, Freiburgstrasse 15, CH-3010 Bern, Switzerland

<sup>3</sup> Helmholtz-Institute for Biomedical Engineering, Biointerface Laboratory, RWTH Aachen University Medical Faculty, Pauwelsstrasse 30, 52074 Aachen, Germany

<sup>4</sup>Present address: Department of Onco-haematology, Geneva Medical University, Geneva, Switzerland

\*corresponding author: [uyen.huynh-do@insel.ch](mailto:uyen.huynh-do@insel.ch)

Supplementary Figure 1:  
 Chronic fetal hypoxia induces intra-uterine growth restriction in mice

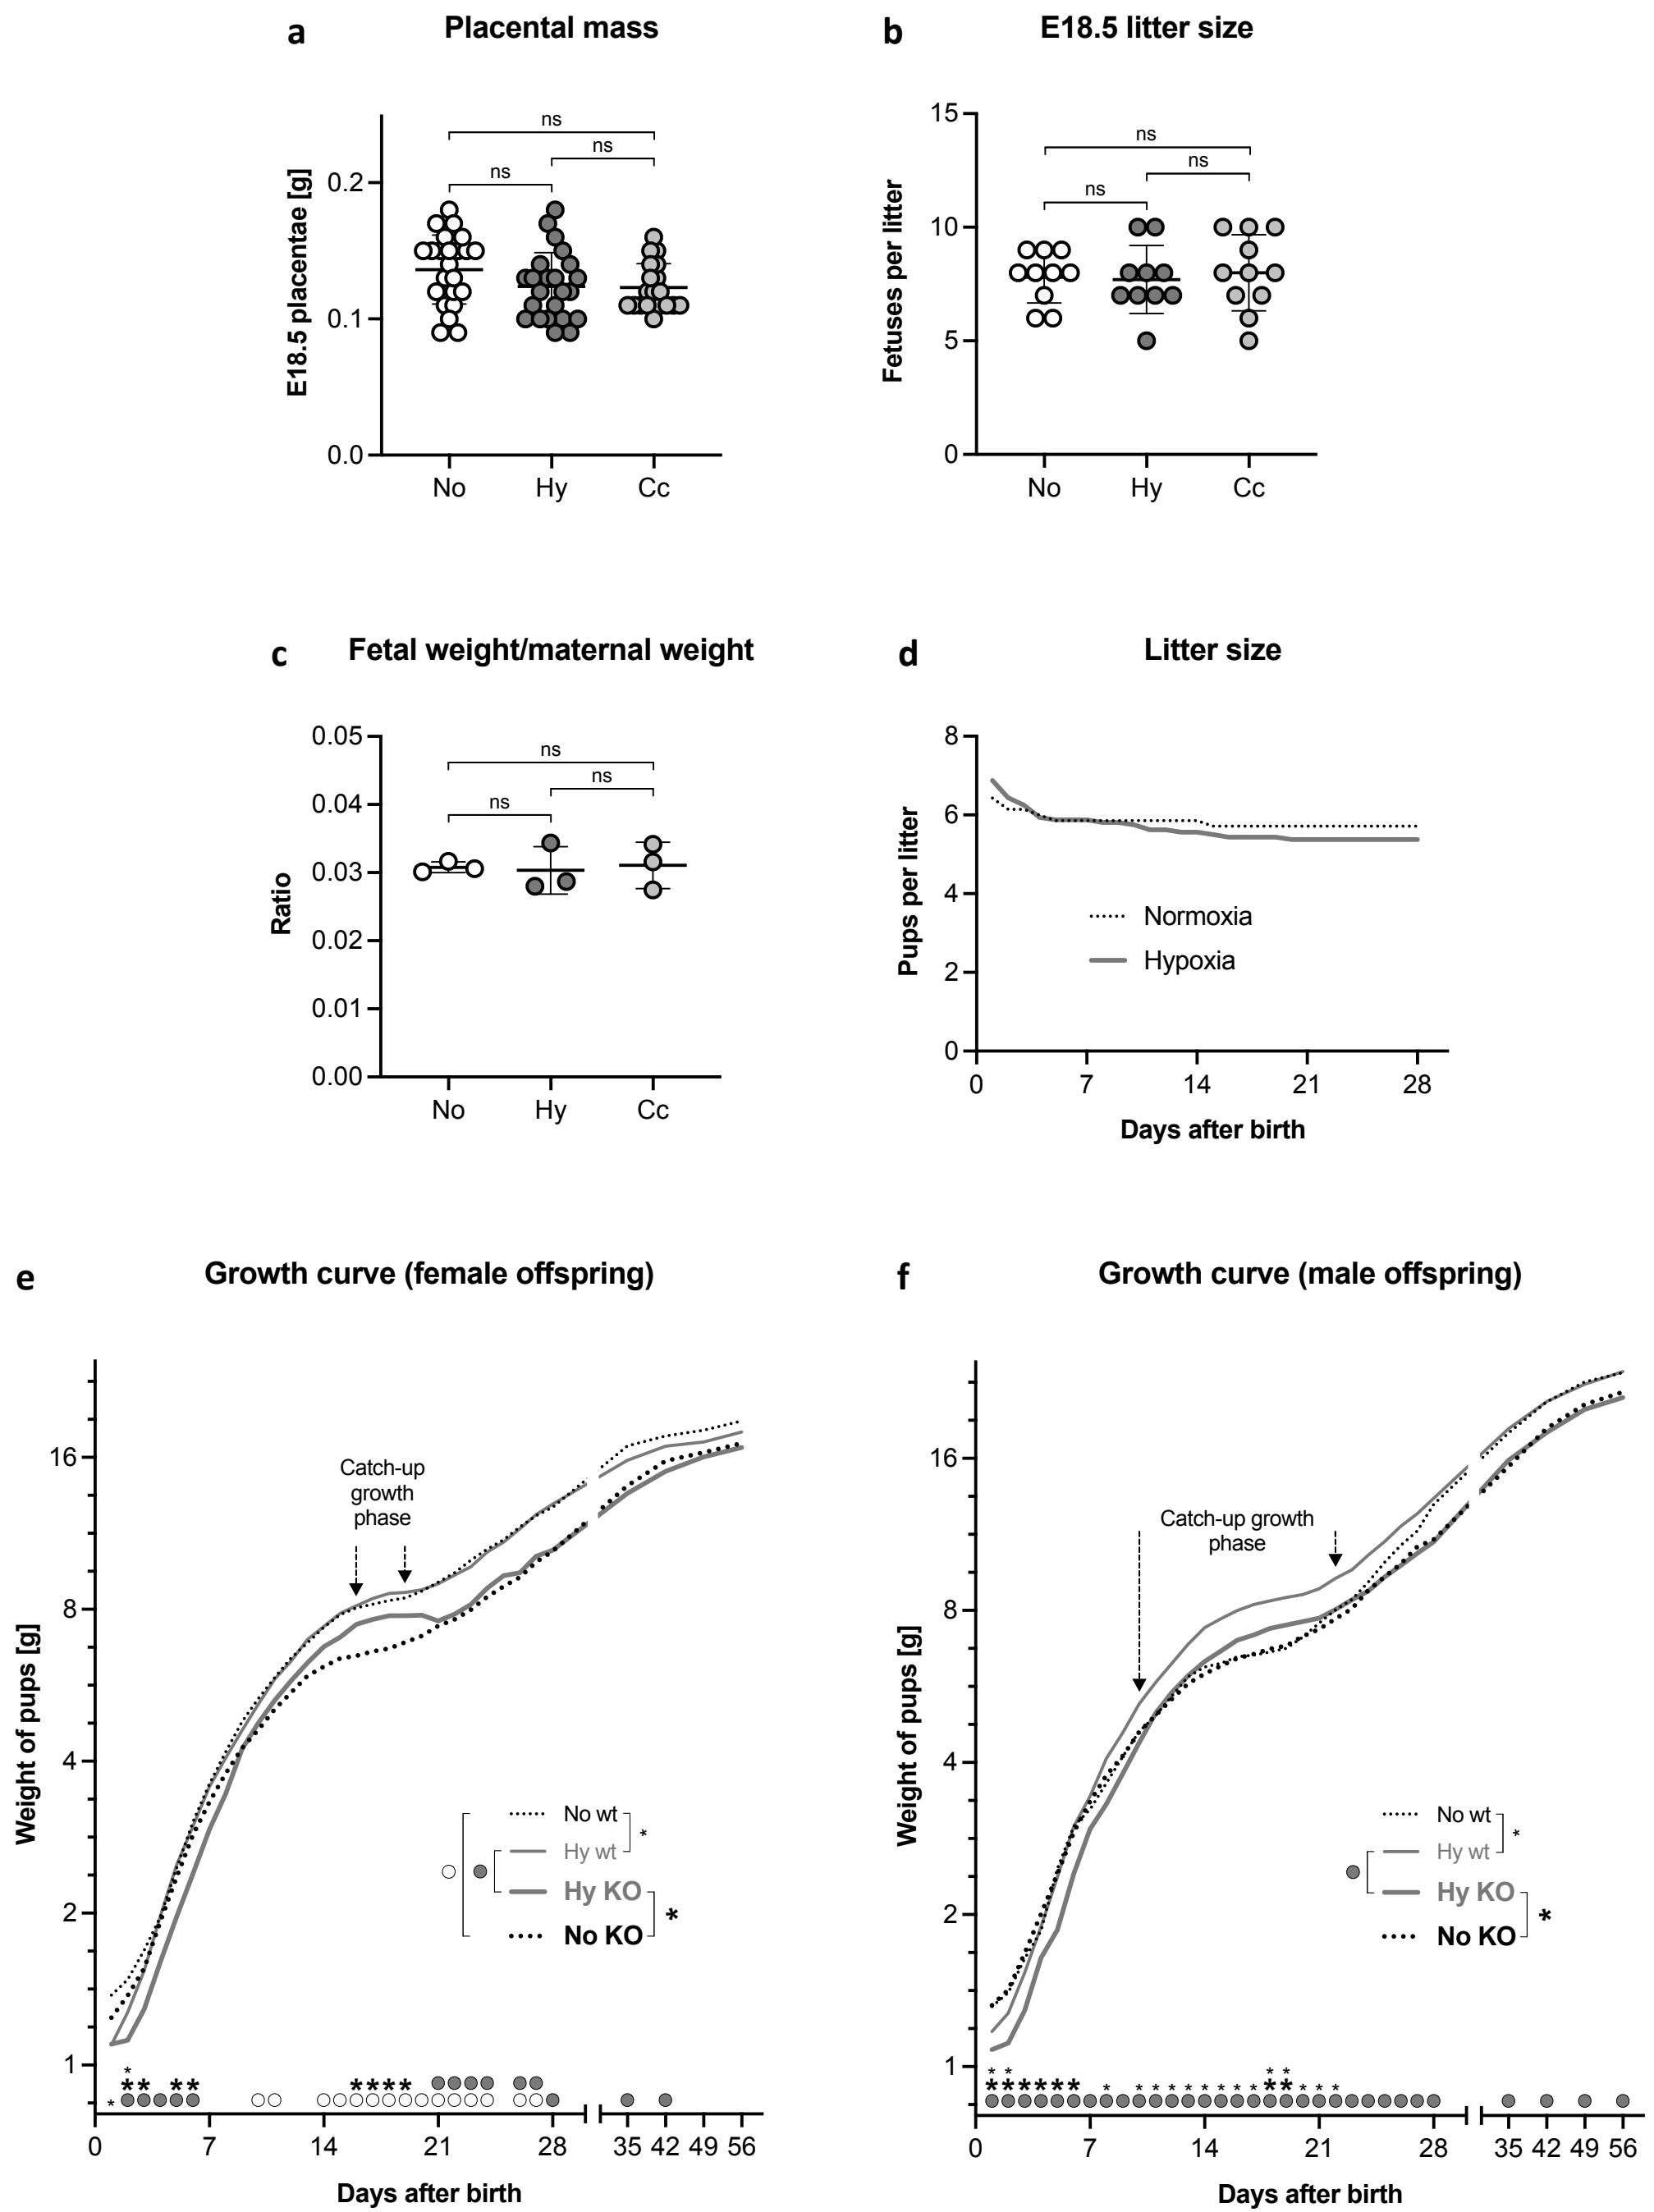

Supplementary Figure 2:  
Kidneys of IUGR fetuses have fewer nephrons

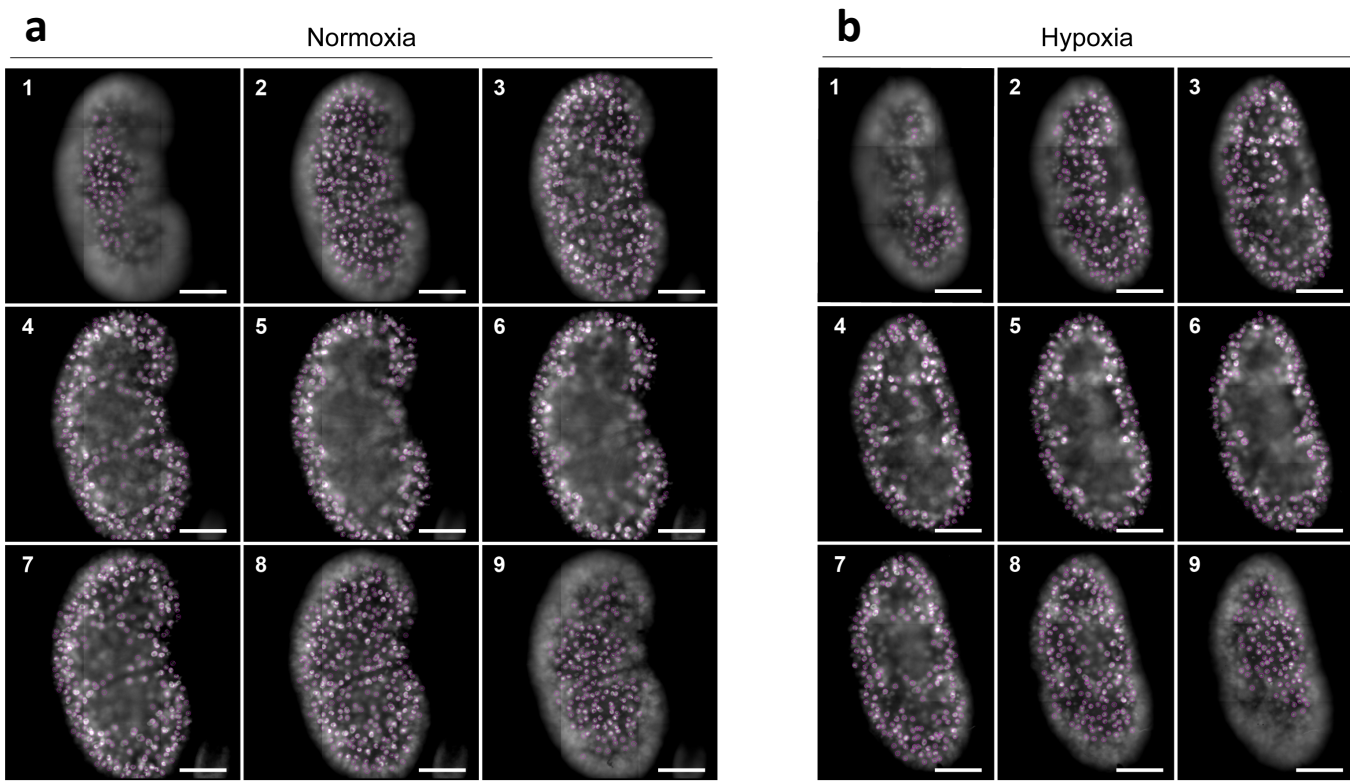

Supplementary Figure 3:  
Hypoxia-induced gene expression in the kidney

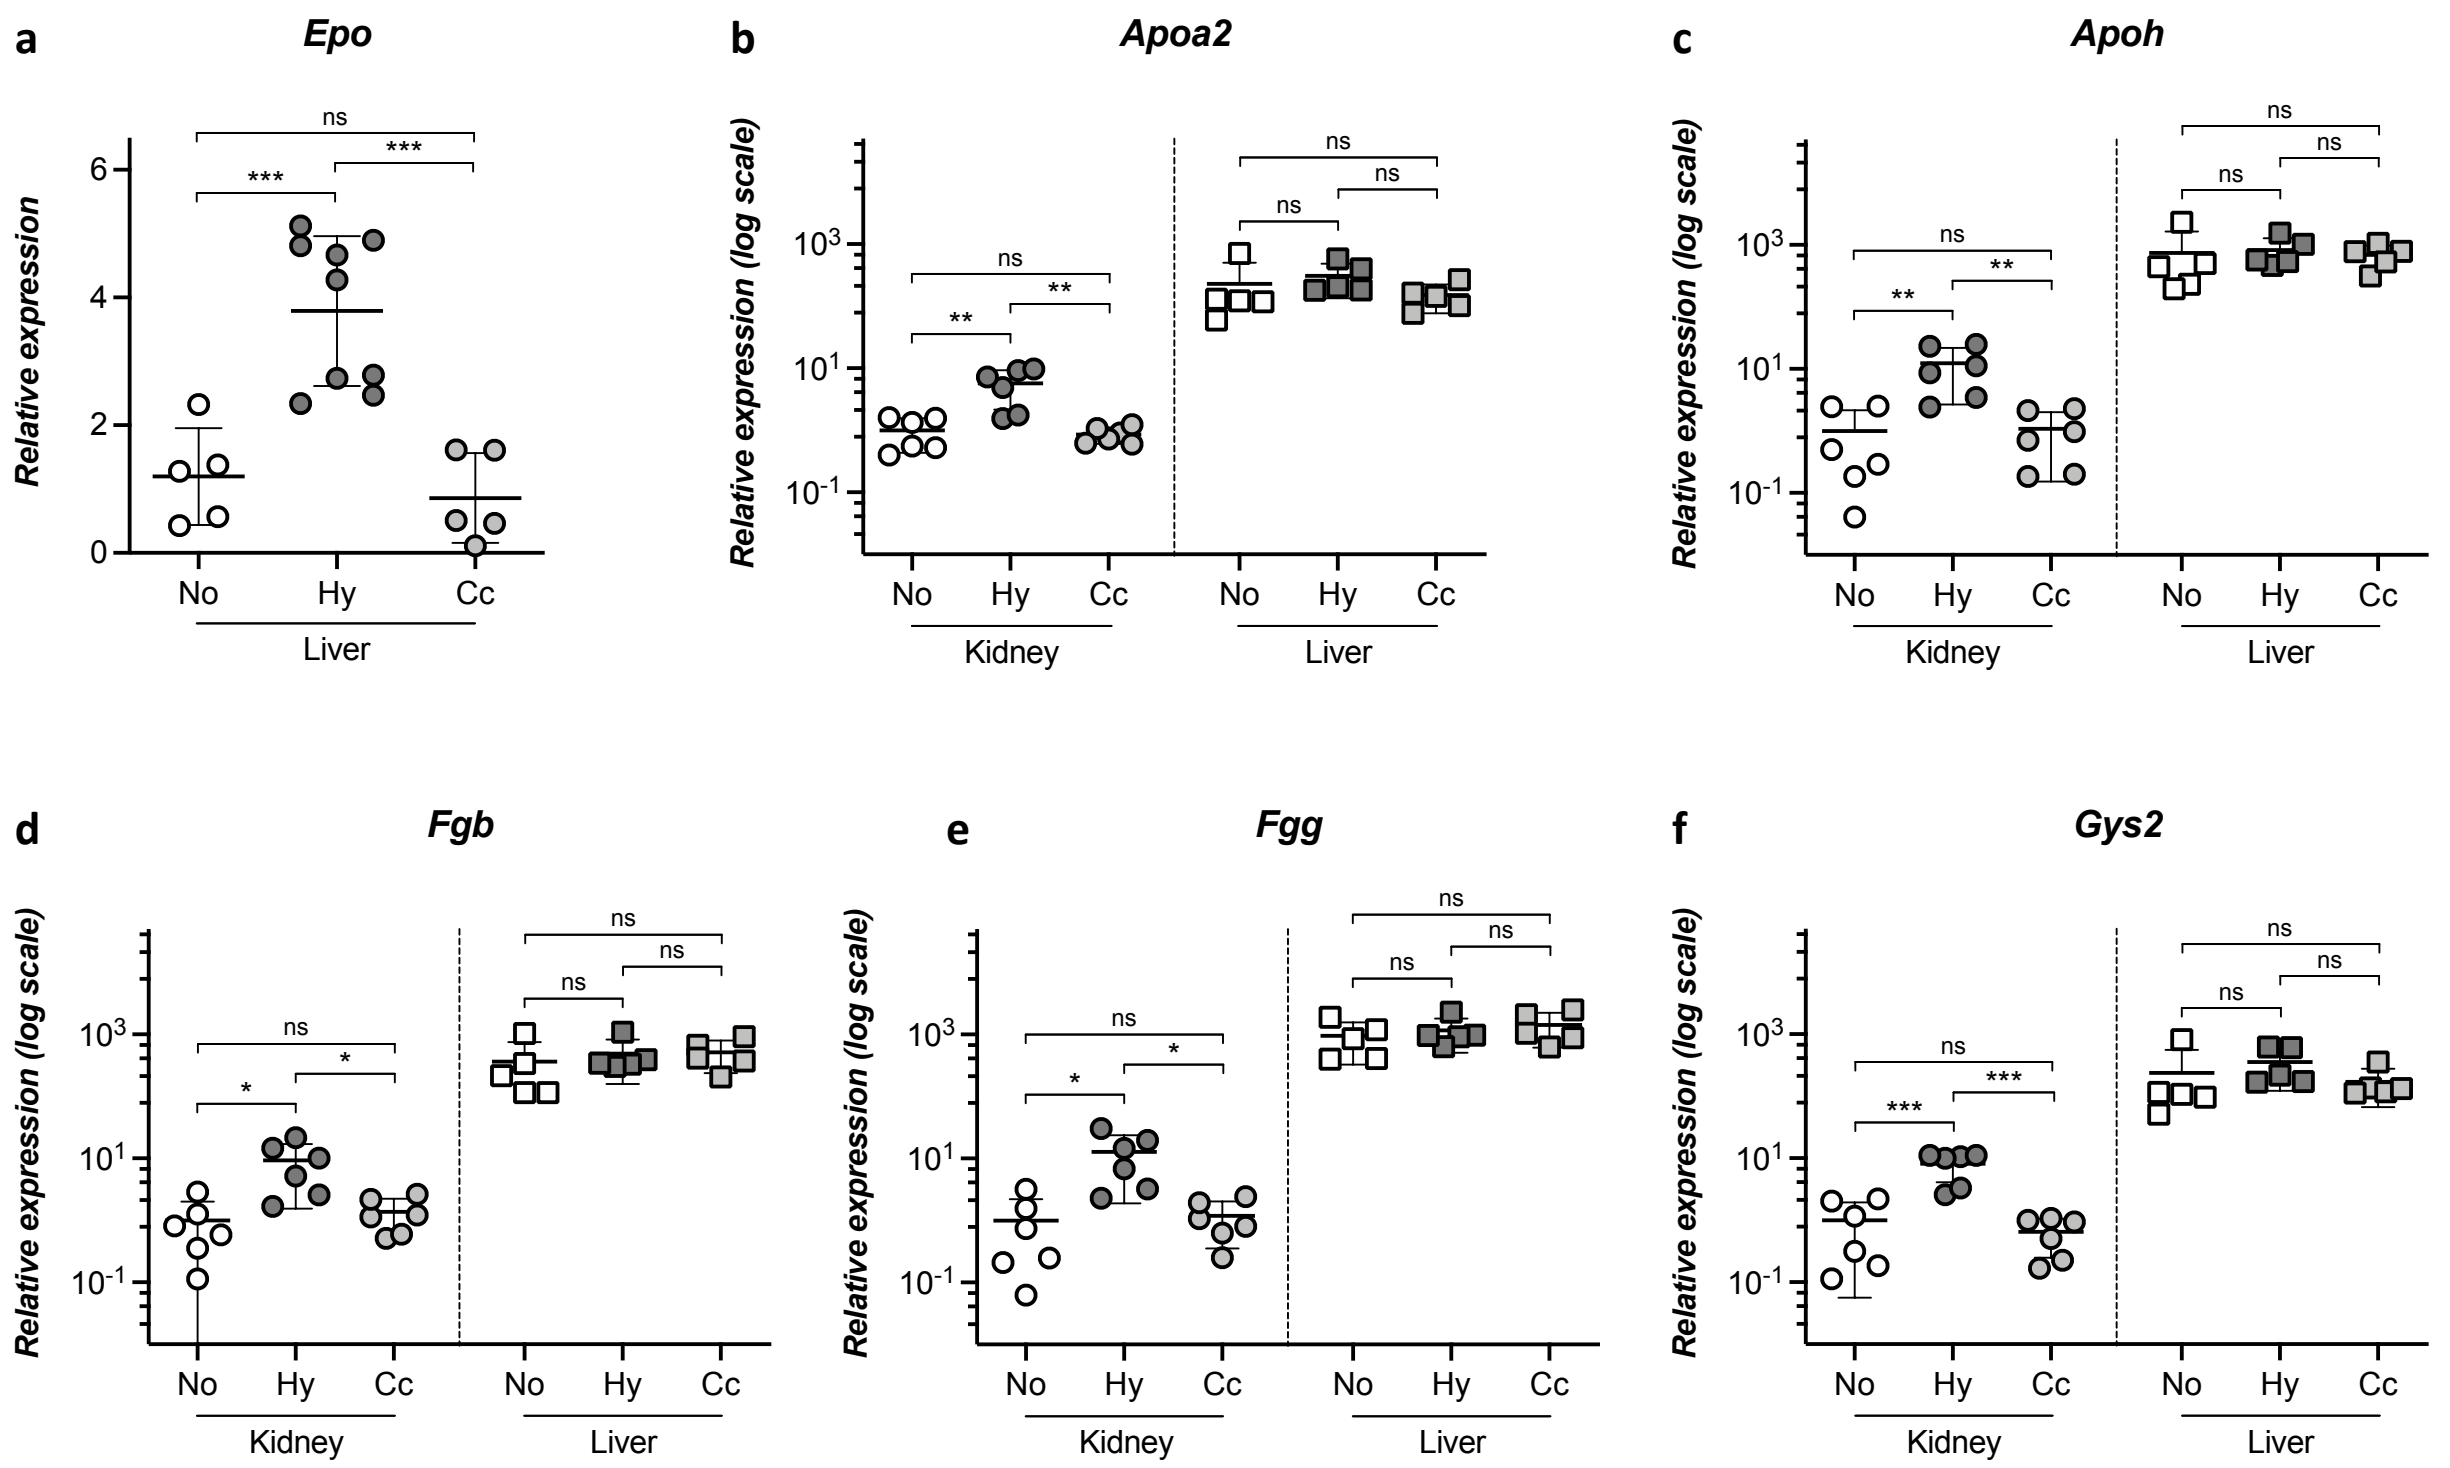



Supplementary Figure 4:  
Localization of fetuin-A transcripts and protein in fetal kidneys

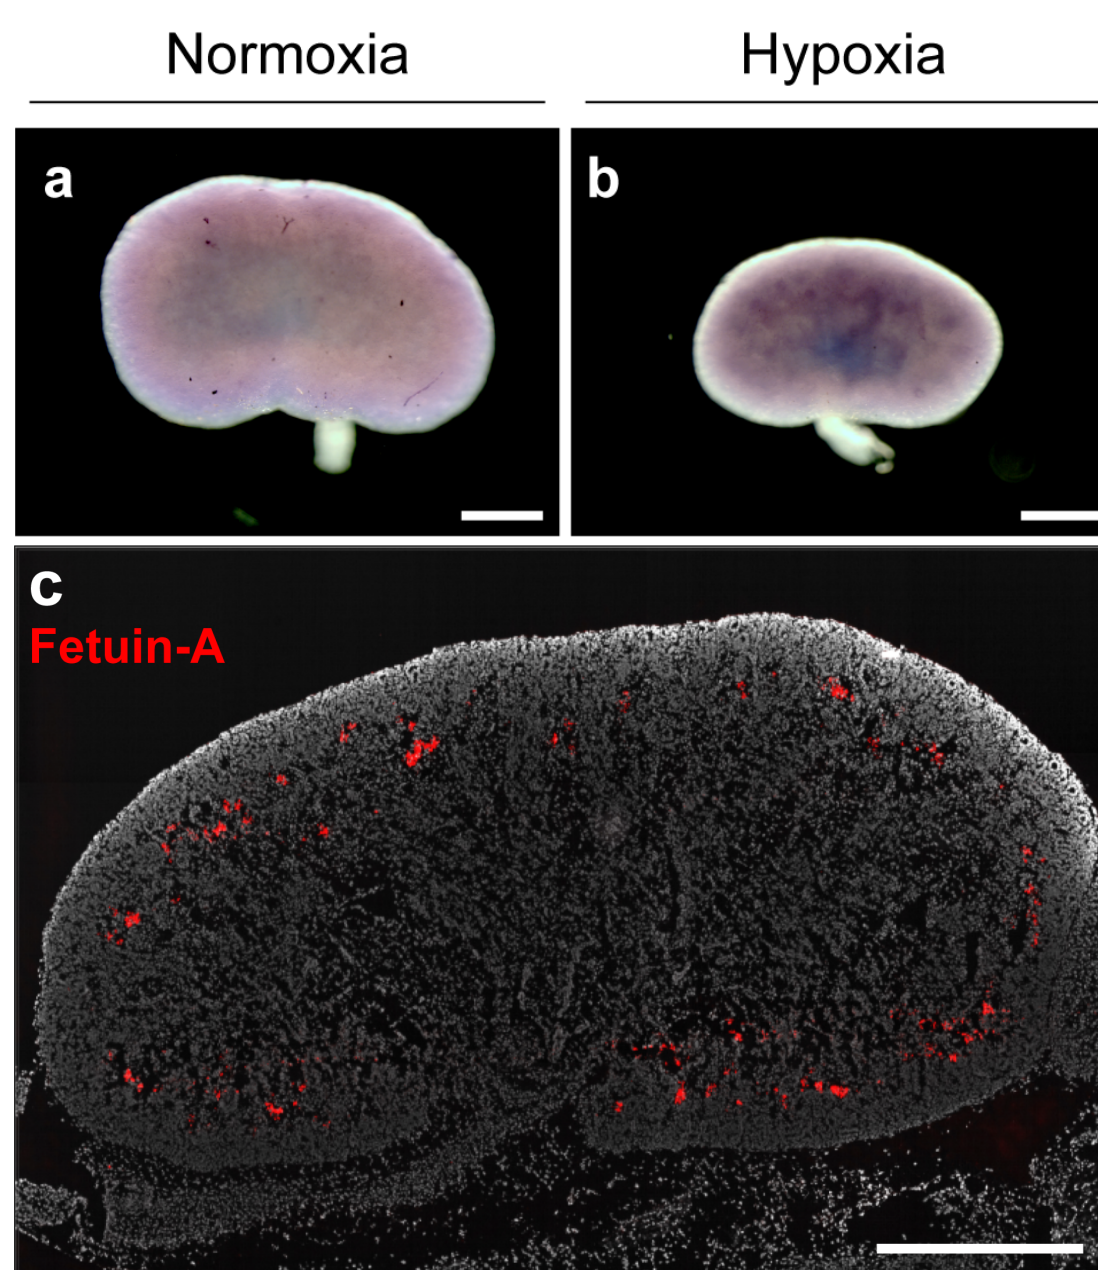

# Supplementary Figure 5: Identification of putative HIF binding sites of the fetuin-A gene locus

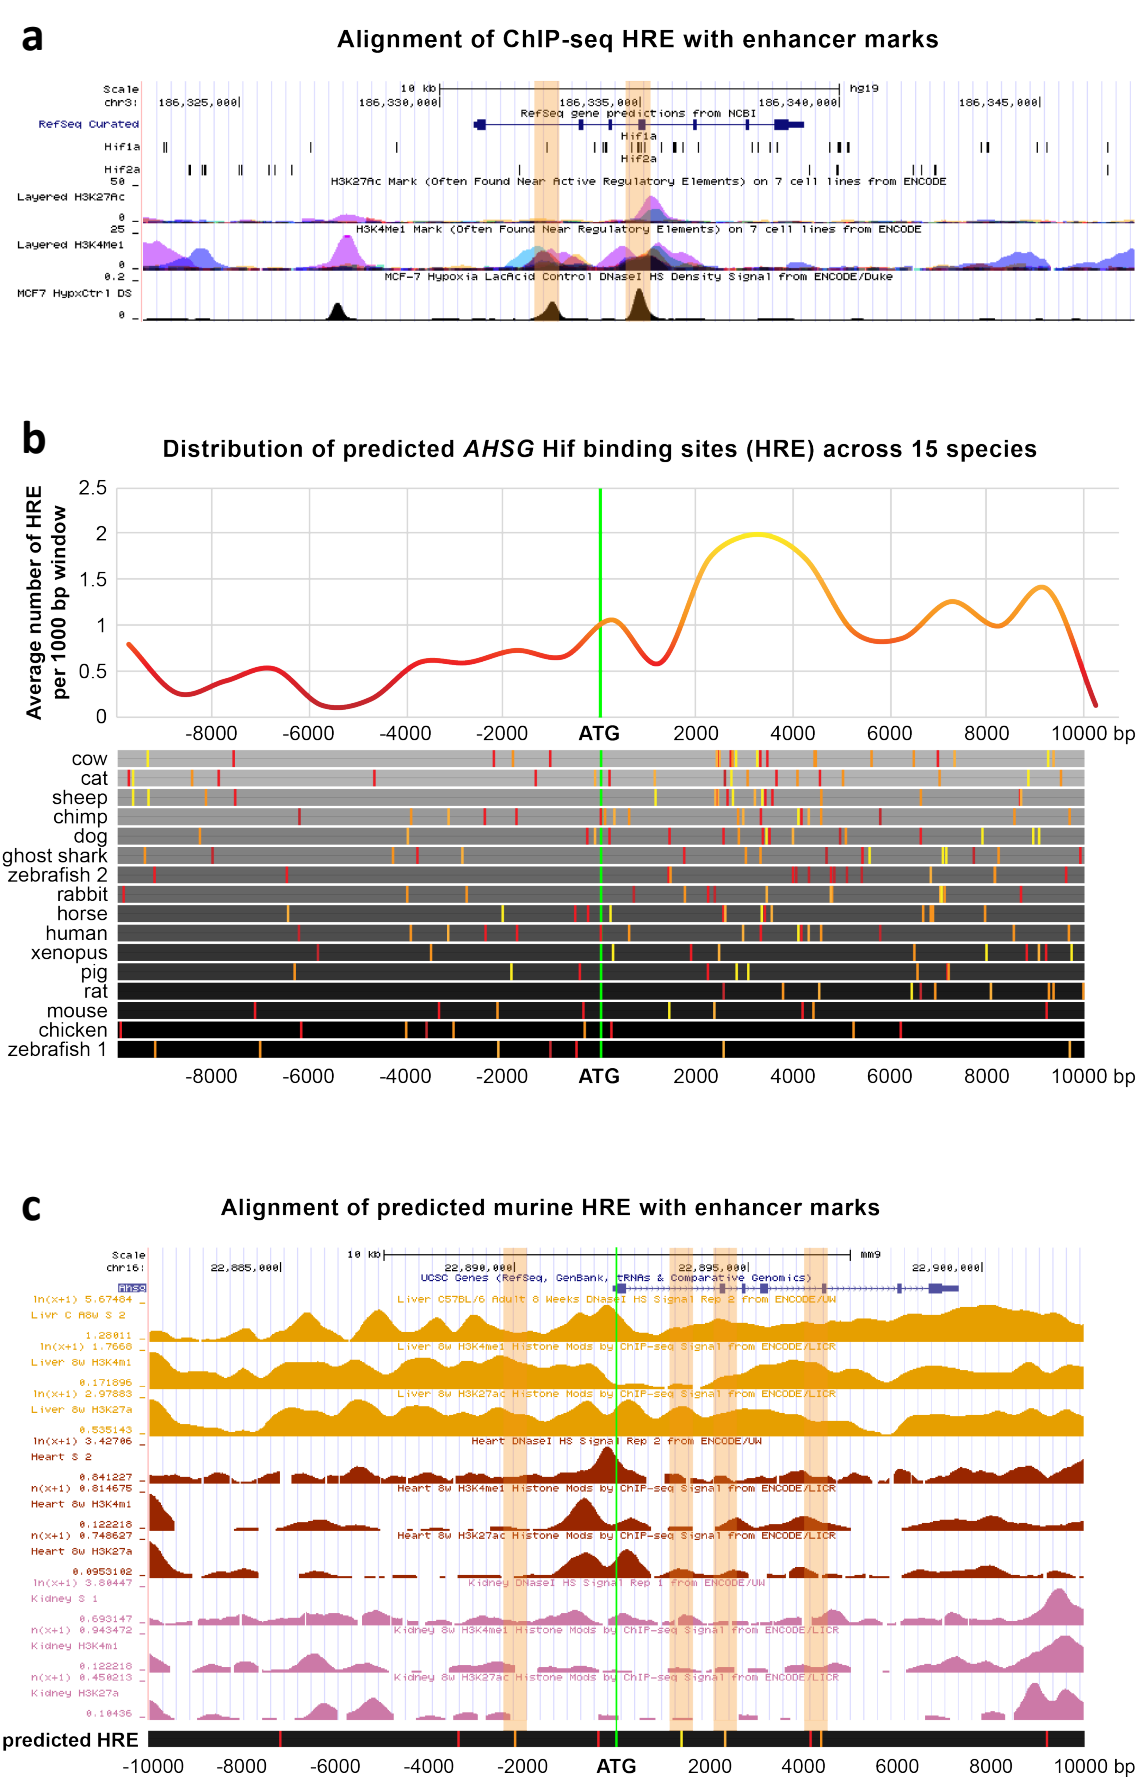

Supplementary Figure 6:  
 Increased expression of fetuin-A and fibrotic markers in hypoxia

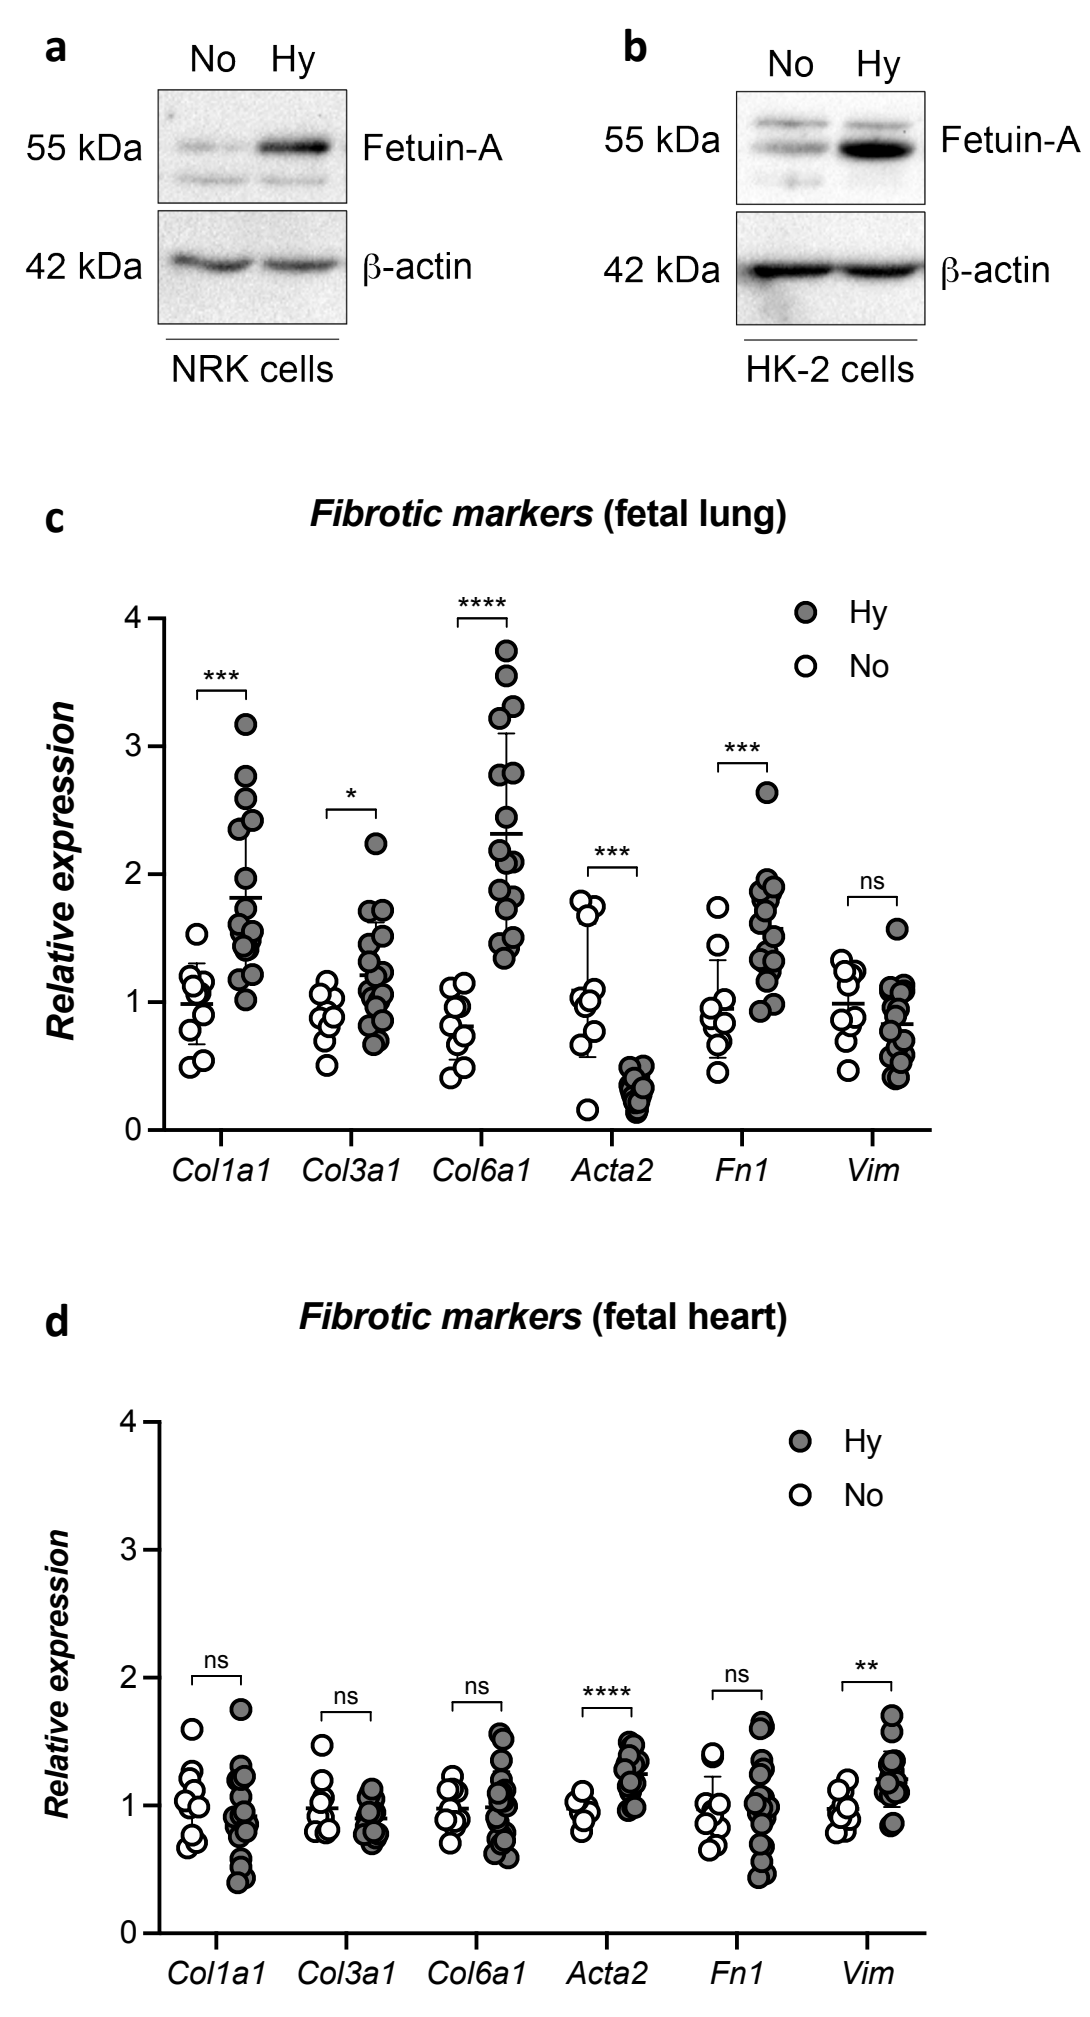

Supplementary Figure 7:  
 Increased expression of fibrosis markers in hypoxic *Ahsg* KO kidneys

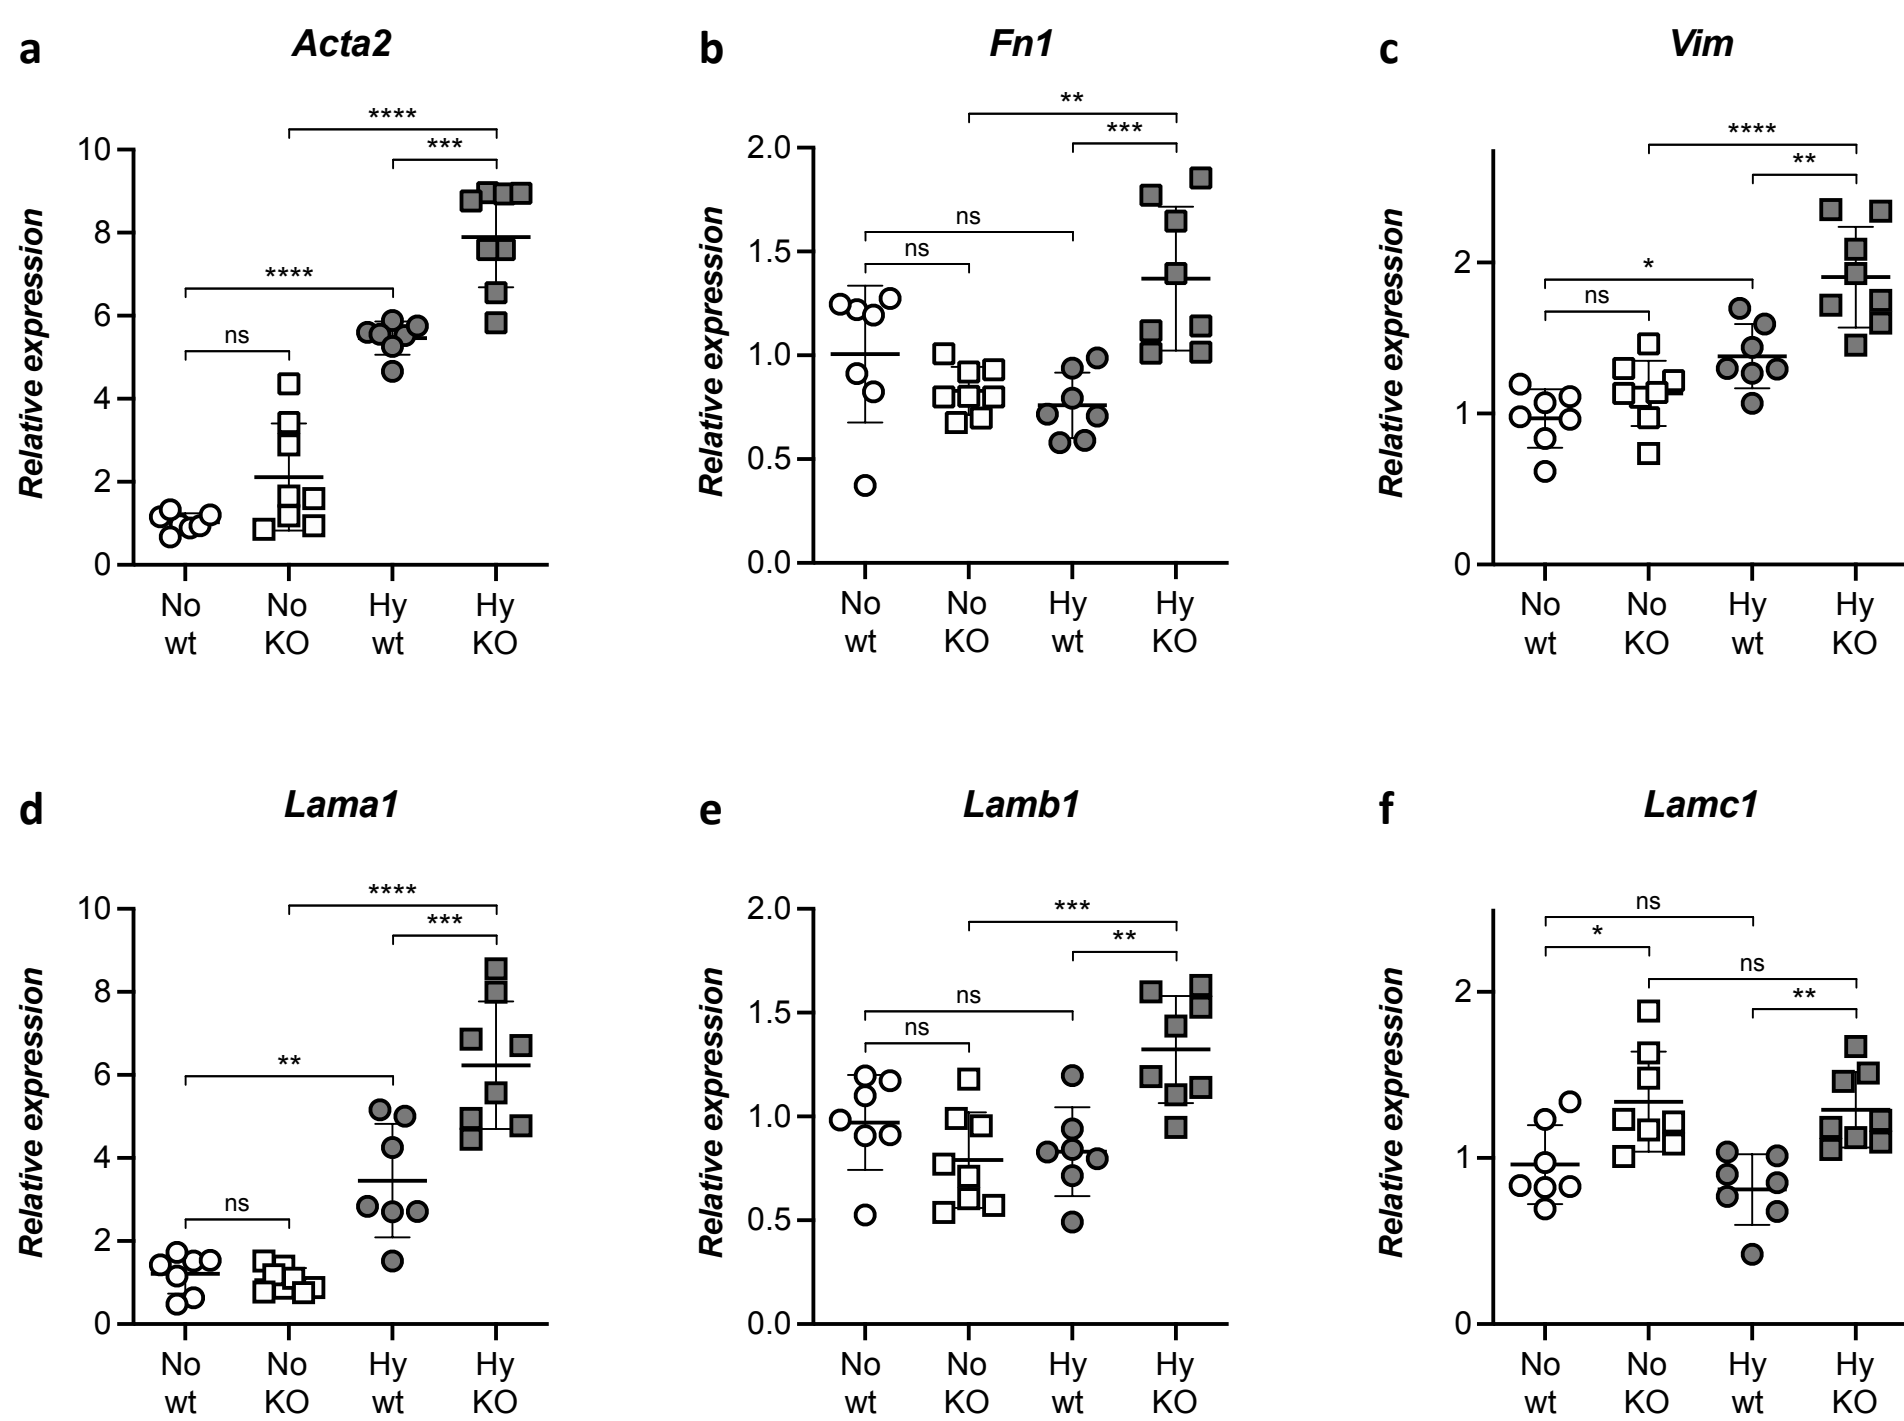

Supplementary Figure 8:  
Fetuin-A attenuates hypoxia-induced expression of fibrotic markers

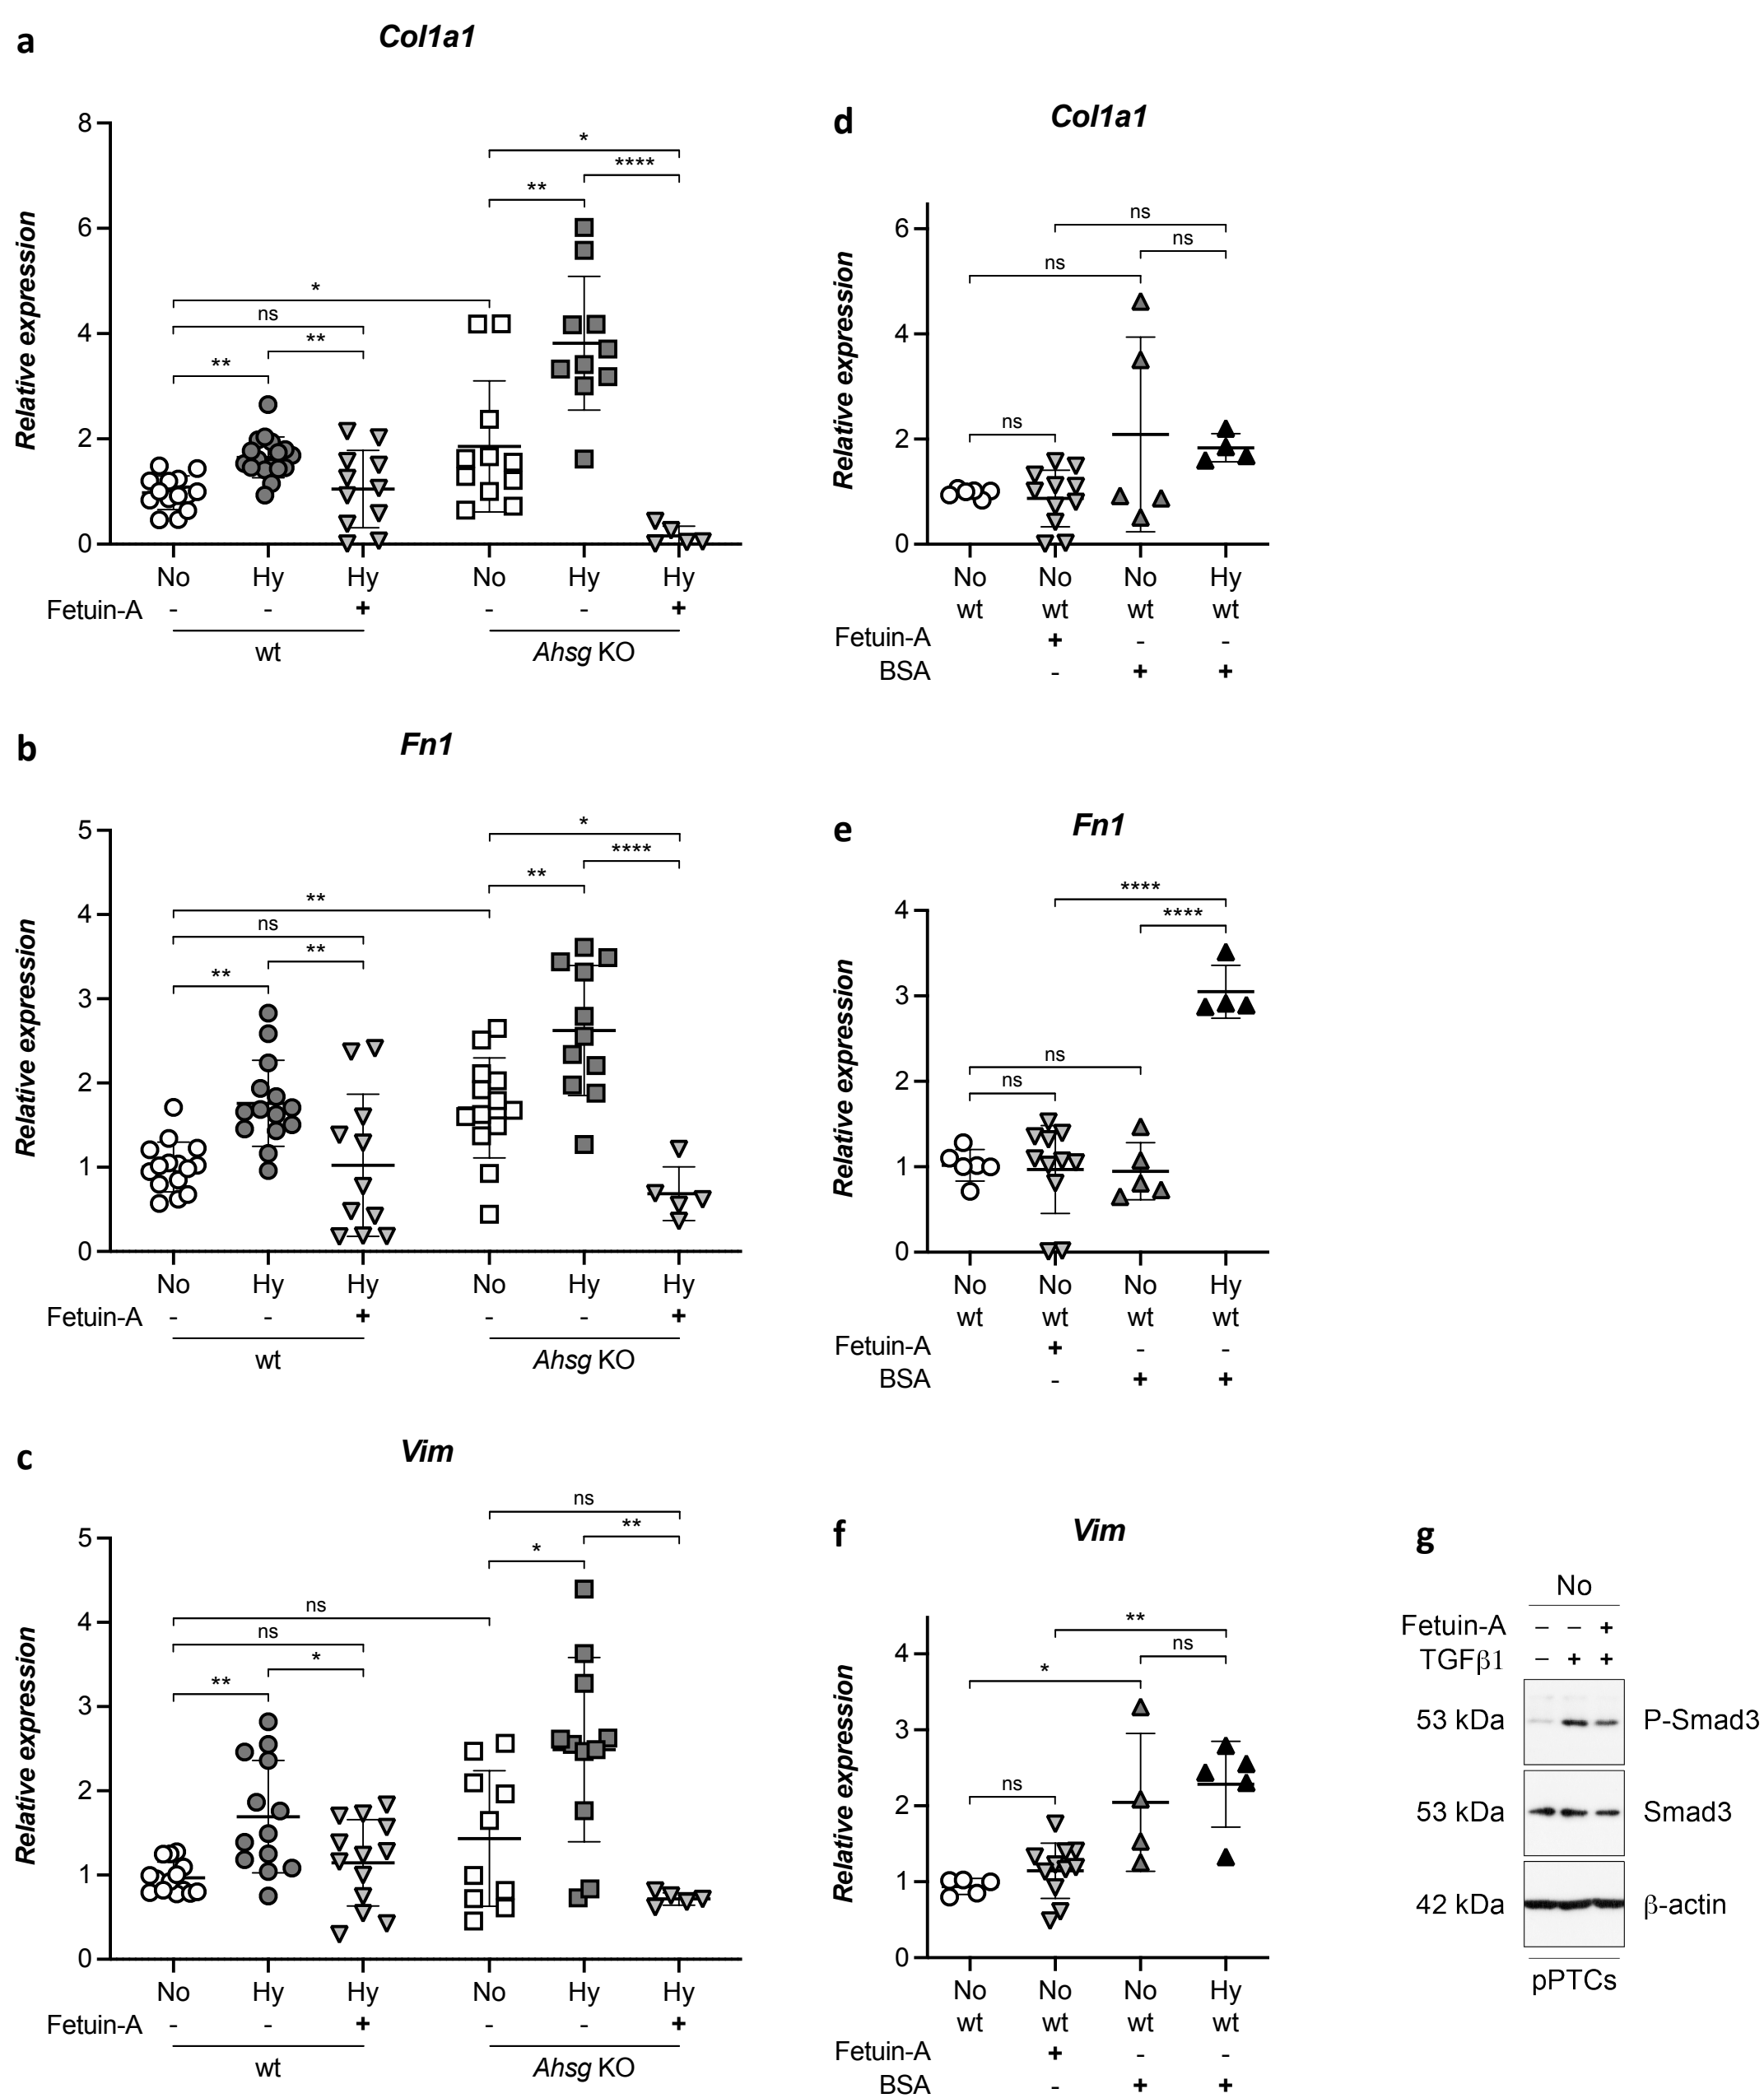

Supplementary Figure 9:

# Fetuin-A mitigates the polarization of pro-inflammatory M1 macrophages

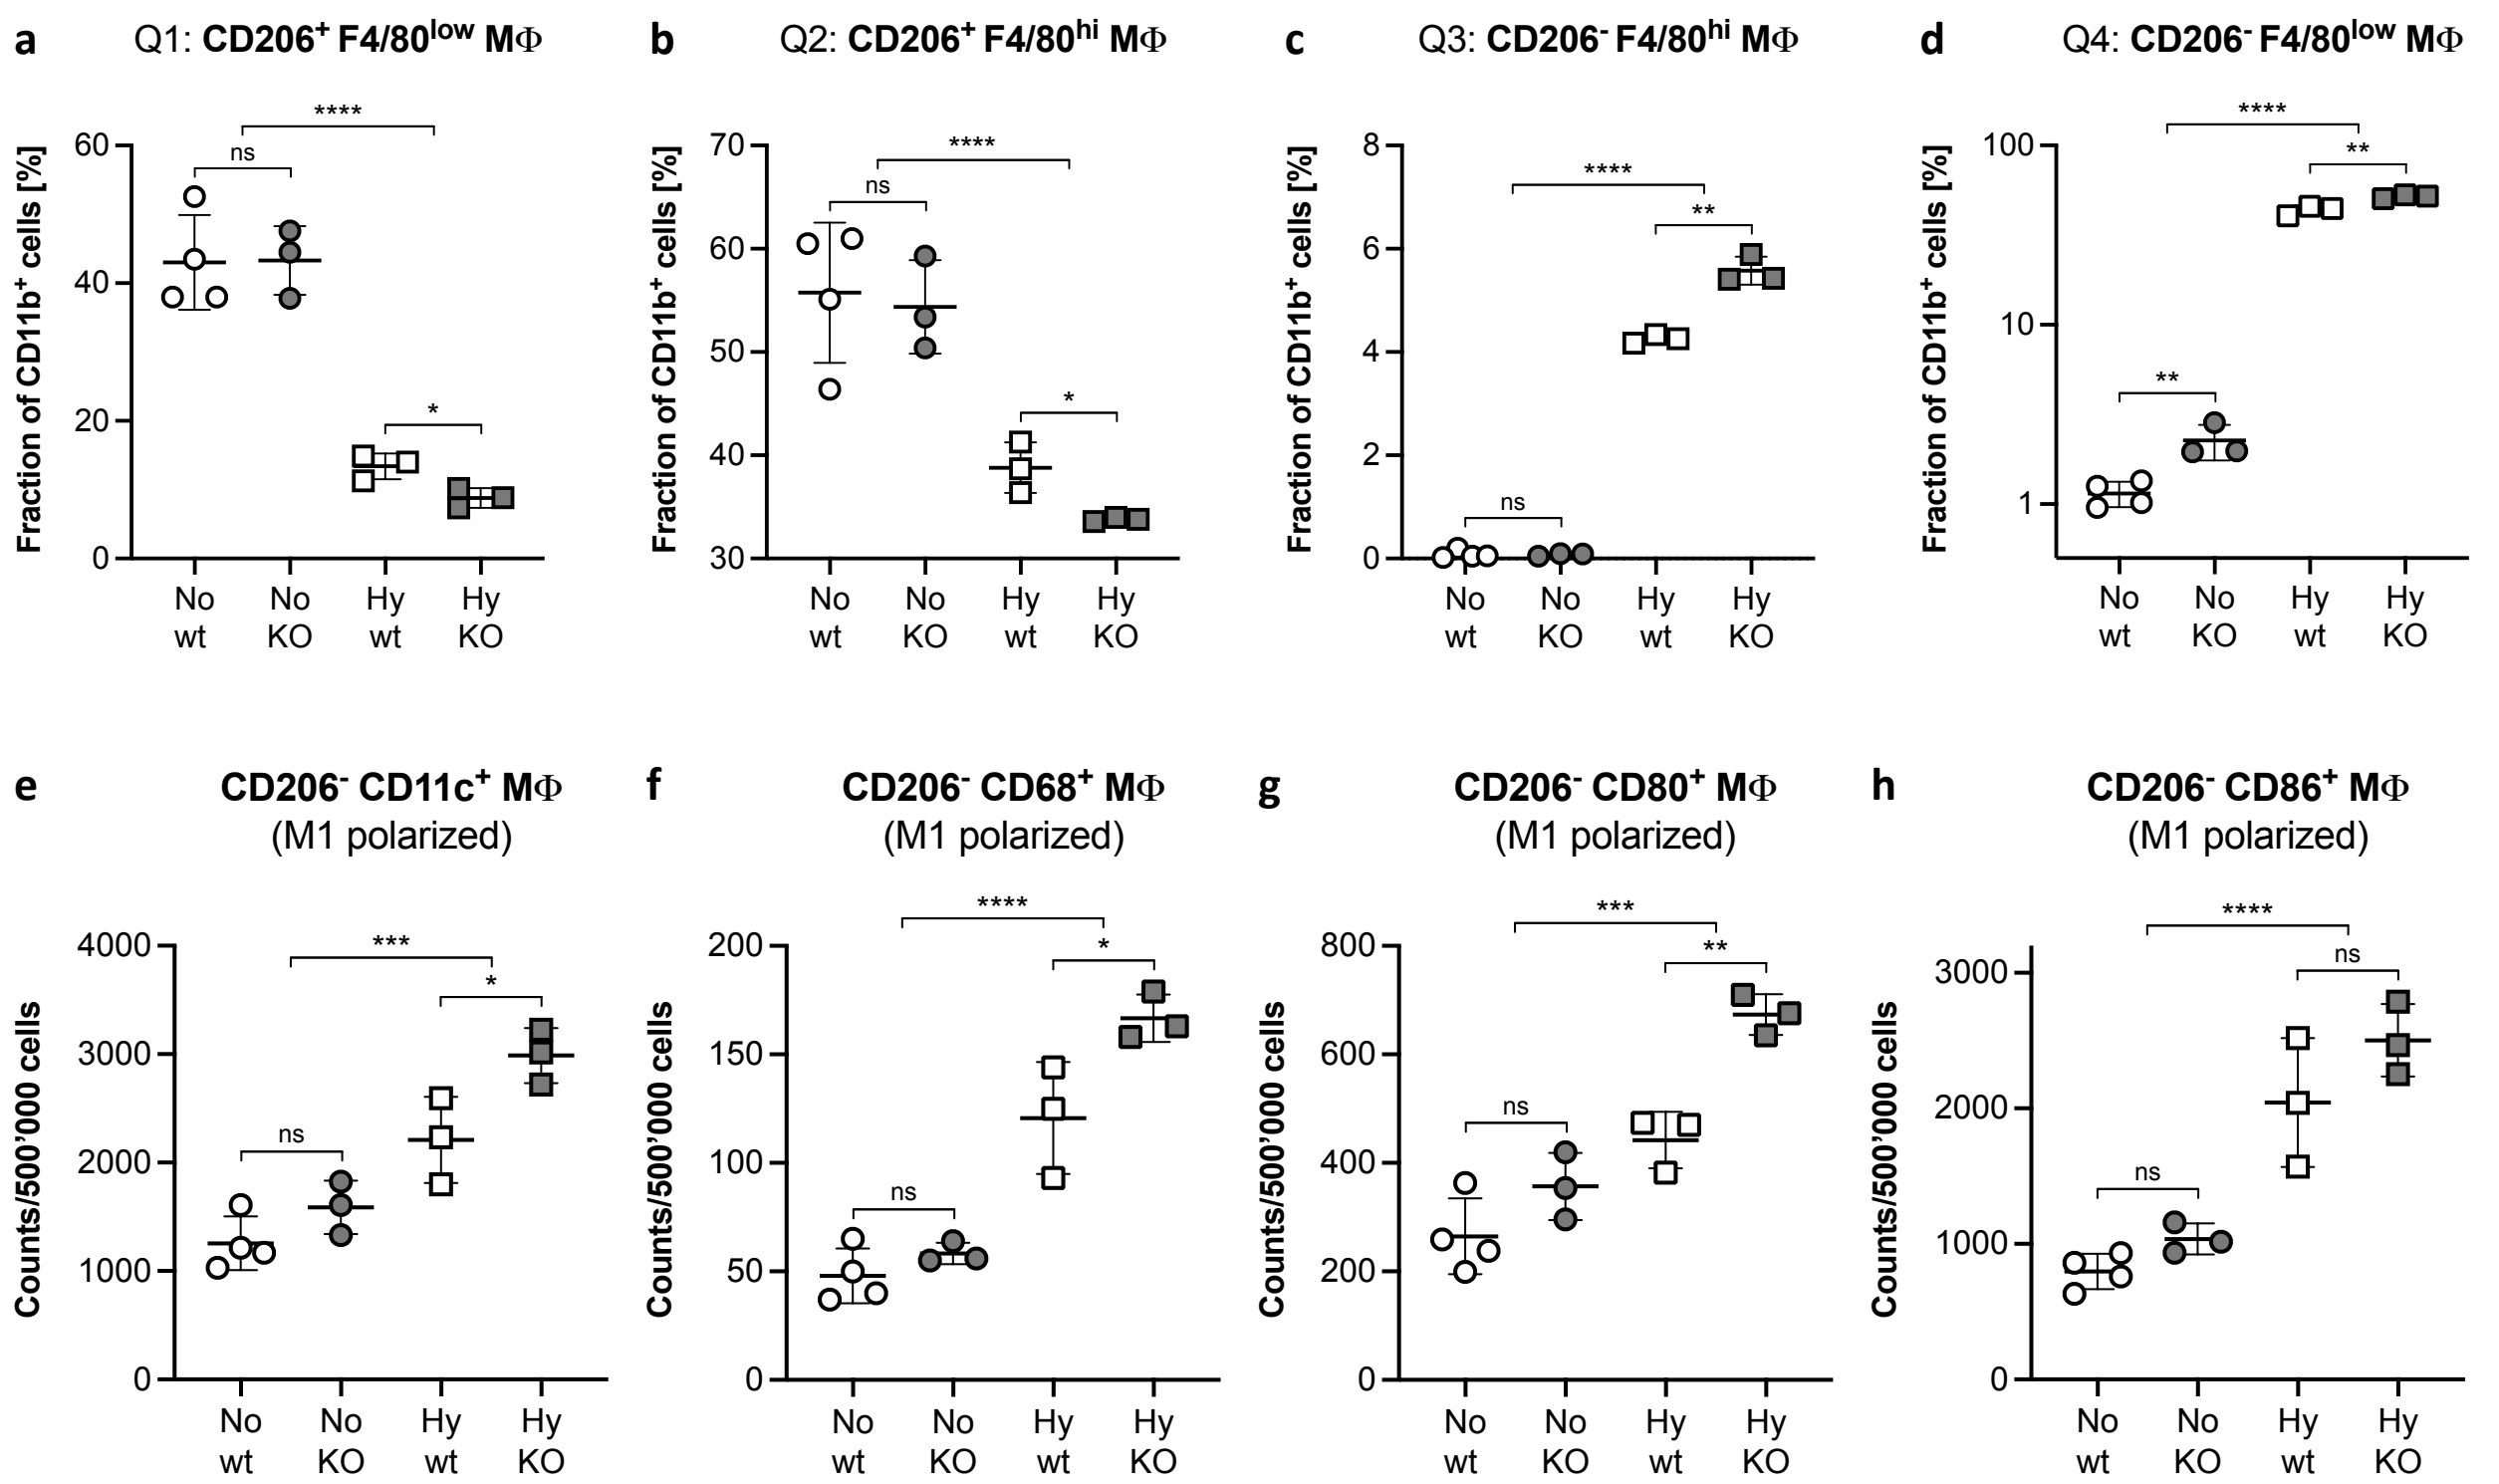

Supplementary Figure 10:  
Apoptosis in hypoxic *Ahsg* KO kidneys

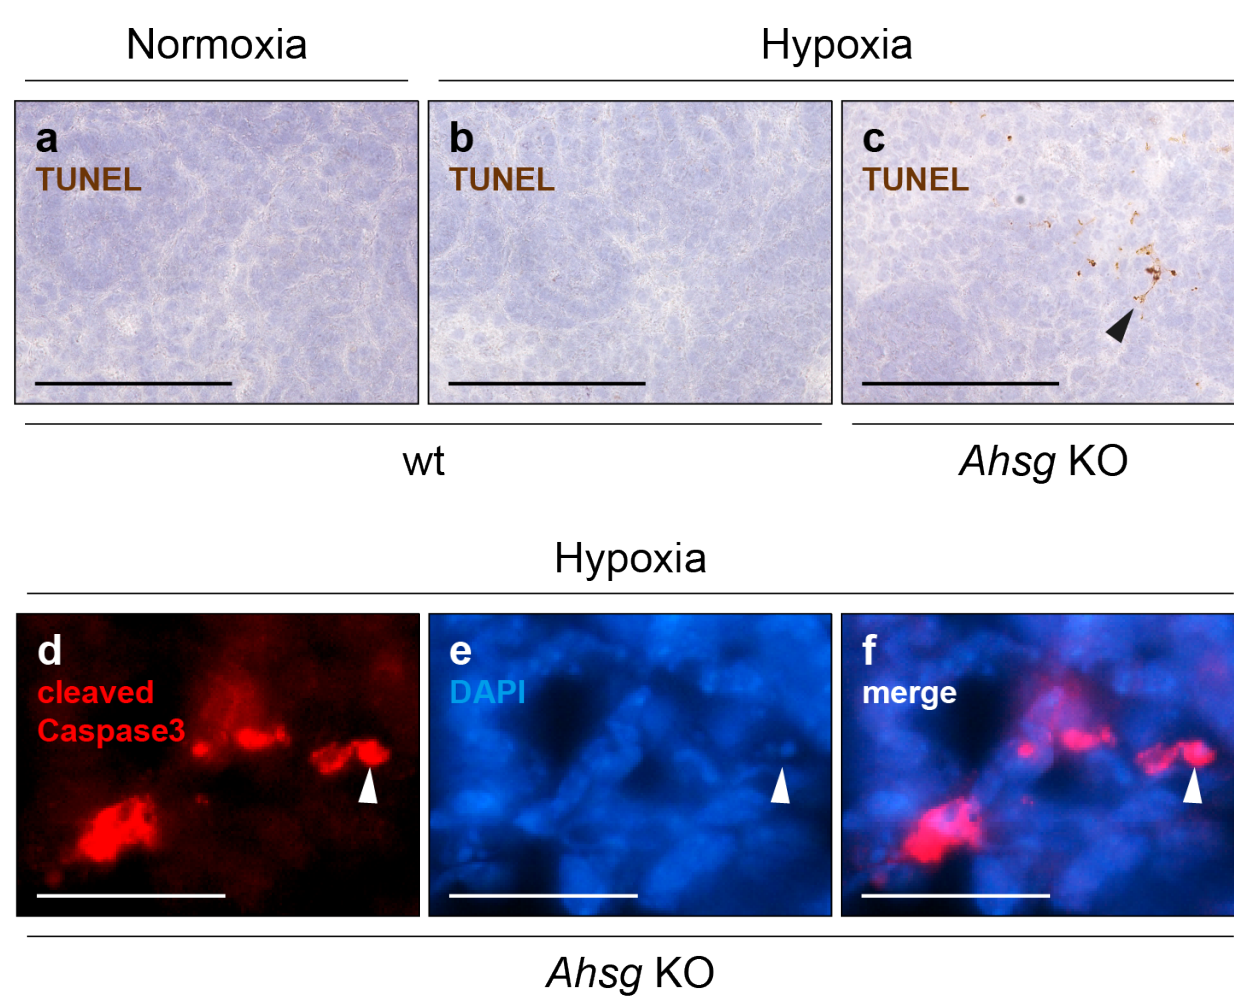



Supplementary Figure 11:  
 Translation of our IUGR model results into a clinical perspective

| Translation of renal insufficiency in our IUGR mouse model to CKD risk groups in human |     |                             |               | Proteinuria categories (mg/mmol Cr) |                |                           |         |                 |         |
|----------------------------------------------------------------------------------------|-----|-----------------------------|---------------|-------------------------------------|----------------|---------------------------|---------|-----------------|---------|
|                                                                                        |     |                             |               | Description and sex-specific ranges |                |                           |         |                 |         |
|                                                                                        |     |                             |               | P1                                  |                | P2                        |         | P3              |         |
|                                                                                        |     |                             |               | Normal to mild increase             |                | Mild to moderate increase |         | Severe increase |         |
| F: <90<br>M: <190                                                                      |     | F: 90-120<br>M: 190-220     |               | F: >120<br>M: >220                  |                |                           |         |                 |         |
| GFR categories (µl/min/100g BW)<br>Description and range                               | G1  | Normal to high              | >900          | No wt F                             | No wt M        | No KO F                   | Hy wt F | Hy wt M         | No KO M |
|                                                                                        | G2  | Mild decrease               | 600-899       |                                     |                |                           |         | Hy KO F         | Hy KO M |
|                                                                                        | G3a | Mild to moderate decrease   | 450-599       |                                     |                |                           |         |                 |         |
|                                                                                        | G3b | Moderate to severe decrease | 300-449       |                                     |                |                           |         |                 |         |
|                                                                                        | G4  | Severe decrease             | 150-299       |                                     |                |                           |         |                 |         |
|                                                                                        | G5  | Kidney failure              | <150          |                                     |                |                           |         |                 |         |
| KDIGO 2012 risk classification                                                         |     | low risk                    | moderate risk | high risk                           | very high risk |                           |         |                 |         |



# Supplementary Figure 12: FACS gating strategy

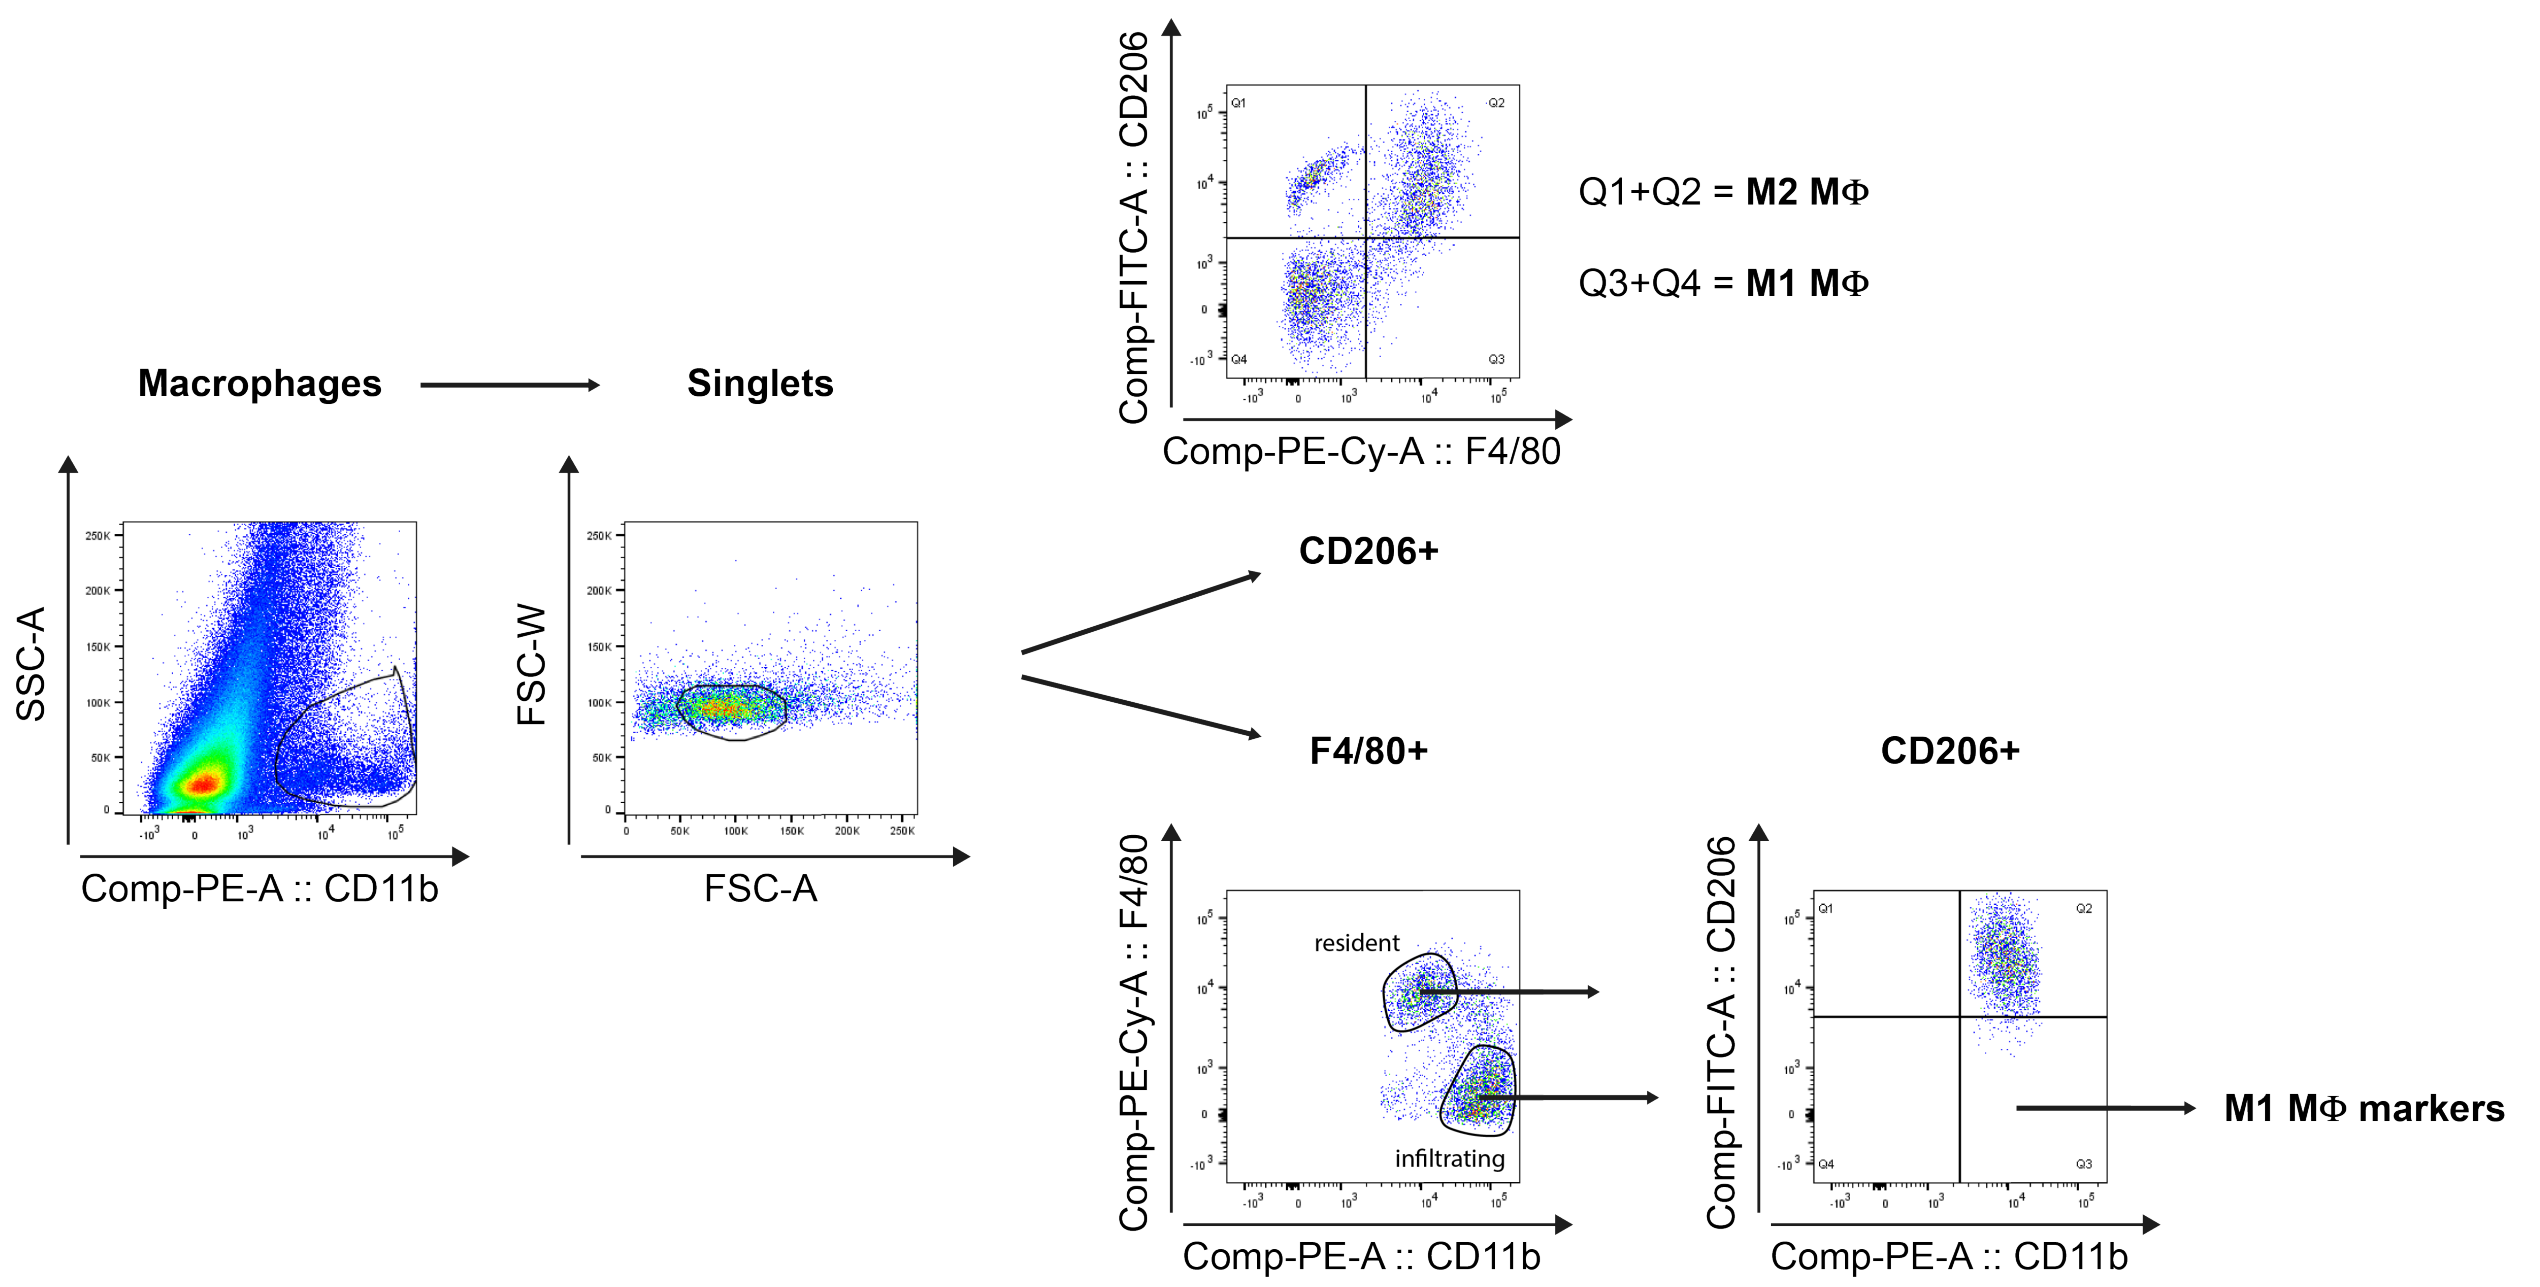

## Supplementary Figure legends

### Supplementary Figure 1 Chronic fetal hypoxia induces intra-uterine growth restriction

**in mice.** **a** Weight of E18.5 placentae (n = 24 No, 23 Hy, and 19 Cc placentae). **b** Number of pups per litter (n = 10 No, 10 Hy, and 11 Cc litters). **c** E18.5 fetal/maternal weight ratio (n = 3 ratios for each condition). **d** Litter size throughout the suckling phase did not differ for normoxic and hypoxic pups. **e,f** Postnatal growth of female (**e**) and male offspring (**f**). Hypoxic offspring (*Ahsg* KO – bold grey line, wild-type – thin grey line) and normoxic offspring (*Ahsg* KO – bold black dotted line, wild-type – thin black dotted line). KOs weighed less than wild-types, catch-up growth was observed for hypoxic offspring during the third week after birth. Grey circles denote significance ( $P < 0.05$ ) between hypoxic offspring, white circles between normoxic offspring, large asterisks between KOs, and small asterisks between wild-types. Data are presented as mean  $\pm$  SEM (**a-c**) or mean only (**d-f**). Ordinary one-way ANOVA with Tukey's multiple comparison test (**a-c**), Multiple 2-sided t tests (**d-f**). (ns =  $P > 0.05$ ). Source data are provided as a Source Data file.

### Supplementary Figure 2 Kidneys of IUGR fetuses have fewer nephrons.

**a,b** 9 Z-stack images of a tissue cleared E18.5 normoxic (**a**) or hypoxic (**b**) kidney using the same magnification, taken at 100 $\mu$ m distance. Purple circles enclose glomeruli stained for nephrin. Images are representative of at least 6 iDisco-stained kidneys. Scale bar = 500  $\mu$ m.

### Supplementary Figure 3 Hypoxia-induced gene expression in the kidney.

**a** Relative *Epo* mRNA levels in E18.5 fetal livers (n = 5 No, 9 Hy, and 5 Cc fetal livers). **b-f** Relative mRNA values of *Apoa2* (**b**), *ApoH* (**c**), *Fgb* (**d**), *Fgb* (**e**) and *Gys2* (**f**) in E18.5 kidneys (circles) or

liver samples (squares). N = 6 kidneys for each condition or 5 livers for each condition.

Kidney and liver samples are analyzed separately. Note the logarithmic scale on the Y-axis.

Data are presented as mean  $\pm$  SEM (**a-f**) or mean only (**d-f**). Ordinary one-way ANOVA with

Tukey's multiple comparison test (**a-f**). (\*\*\*)  $P < 0.001$ ; (\*\*)  $P < 0.01$ ; (\*)  $P < 0.05$ ; ns =  $P >$

0.05). Source data are provided as a Source Data file.

#### **Supplementary Figure 4 Localization of fetuin-A transcript and protein in fetal kidneys.**

**a,b** *In situ* hybridization for *Ahsg* in normoxic (**a**) or hypoxic (**b**) E18.5 whole-mount kidneys.

**c** Immunofluorescent staining for Fetuin-A revealed that the protein was present in the outer renal cortex, just below the nephrogenic zone, forming an arch running along the

circumference of the kidney, exactly where mature PTs are located in an E18.5 kidney. No

staining was found in the inner cortex or the medulla. Images are representative of at least 3

independent experiments (**a-c**). Scale bar = 500  $\mu$ m.

#### **Supplementary Figure 5 Identification of putative HIF binding sites of the fetuin-A**

**locus. a** Genome browser image of human *AHSG* (top) illustrating the proximity of putative HIF binding sites (hypoxia response element – HRE) with epigenetic markers of active

regulatory elements (H3K27Ac and H3K4Me1, middle) and open chromatin (DNaseI hypersensitivity, bottom). The orange bars traversing the image highlight two HREs

overlapping with these epigenetic markers. **b** Location of potential HREs for fetuin-A of 15

different species. The upper panel shows the average distribution of these sites per 1kb

window relative to the ATG (green line) of the fetuin-A genes. The lower panel depicts the

exact locations of the predicted HREs for each species. The species are sorted (from top to

bottom) according to the number of predicted HREs, Zebrafish has two *Ahsg* genes. HREs

with a relative score >0.9 are shown in red, >0.93 in orange and >0.97 in yellow. **c** Genome browser image of mouse *Ahsg* (top) illustrating the proximity of predicted HREs with H3K27Ac, H3K4Me1 and DNaseI hypersensitivity in heart (brown), kidney (purple) or liver (orange). The orange bars traversing the image highlight HREs with a relative score >0.93.

### **Supplementary Figure 6 Increased expression of fetuin-A and fibrotic markers in**

**hypoxia. a,b** Expression of fetuin-A protein in the rat cell line NRK (**a**) or in the human cell line HK-2 (**b**) cultured under normoxic or hypoxic conditions. Images are representative of two independent Western blots. Uncropped blots in Source Data. **c,d** Relative mRNA expression levels of collagens (*Coll1a1*, *Col3a1*, and *Col6a1*),  $\alpha$ -smooth muscle actin (*Acta2*), fibronectin (*Fnl*), and vimentin (*Vim*) in lungs (**c**) or hearts (**d**) from normoxic (white circles) or hypoxic fetuses (grey circles). Data were analyzed from n = 9-10 No and 17-18 Hy fetal lungs, or 10-11 No and 17-19 Hy fetal hearts and are shown as mean  $\pm$  SEM. Unpaired 2-sided t test (with Welch's correction for lung *Coll1a1*, *Col3a1*, *Col6a*, and *Acta2*). (\*\*\*\* P < 0.0001; \*\*\* P < 0.001; \*\* P < 0.01; \* P < 0.05; ns = P > 0.05). Source data are provided as a Source Data file.

### **Supplementary Figure 7 Increased expression of fibrosis markers in kidneys of hypoxic**

***Ahsg* KO adult offspring. a-f** Relative mRNA expression levels of *Acta2* (**a**), *Fnl* (**b**), *Vim* (**c**), *Lama1* (**d**), *Lamb1* (**e**), and *Lamc1* (**f**) were markedly enhanced in kidneys of hypoxic *Ahsg* KO offspring. Data were analyzed from n = 7 No wt, 8 No KO, 7 Hy wt, and 8 Hy KO offspring and are presented as mean  $\pm$  SEM. Ordinary one-way ANOVA with Tukey's multiple comparisons test. (\*\*\*\* P < 0.0001; \*\*\* P < 0.001; \*\* P < 0.01; \* P < 0.05; ns = P > 0.05). Source data are provided as a Source Data file.

**Supplementary Figure 8 Fetuin-A attenuates hypoxia-induced expression of fibrotic markers *in vitro*.** **a-c** Fetuin-A supplementation (downward pointing triangles) attenuated the hypoxia-induced mRNA expression of *Coll1a1* (**a**), *Fnl1* (**b**), and *Vim* (**c**) in pPTCs. N = 14-15 No wt, 13-17 Hy wt, 10-13 No *Ahsg* KO and 10-11 Hy *Ahsg* KO samples without fetuin-A supplementation, and 11-13 Hy wt and 5 Hy *Ahsg* KO samples with fetuin-A supplementation. Wt and *Ahsg* KO samples are analyzed separately. Unpaired 2-tailed t test with Welch's correction (only for comparison of normoxic wt and normoxic *Ahsg* KO samples). **d-f** BSA supplementation (upward pointing triangles), did not reduce the expression of *Coll1a1* (**d**), *Fnl1* (**e**), and *Vim* (**f**) in wt pPTCs. N = 5-6 No samples without treatment, 11 No samples with fetuin-A treatment, 4-5 No and 4-5 Hy samples with BSA treatment. **g** Simultaneous treatment with TGF- $\beta$ 1 and fetuin-A reduced the phosphorylation of Smad3 in pPTCs. Images are representative of 2 Western blots. Uncropped blots in Source Data. Data were analyzed from n = pPTCs derived from kidneys of wt or *Ahsg* KO mice and are presented as mean  $\pm$  SEM (**a-f**). Ordinary one-way ANOVA with Tukey's multiple comparisons test (**a-f**). (\*\*\*\* P < 0.0001; \*\* P < 0.01; \* P < 0.05; ns = P > 0.05). Source data are provided as a Source Data file.

**Supplementary Figure 9 Fetuin-A mitigates the polarization of pro-inflammatory M1 macrophages in fetal hypoxic kidneys.** **a-d** Quantification of the 4 quadrants of the FACS blots shown in Figs. 7g-j. **e-h** Graphical presentation of the data shown in Table 1. Data were analyzed from n = 4 No wt, 3 No KO, 3 Hy wt, and 3 Hy KO fetal kidneys and are presented as mean  $\pm$  SEM (**a-h**). Unpaired 2-tailed t test (with Welch's correction if required) (**a-h**). (\*\*\*\* P < 0.0001; \*\*\* P < 0.001; \*\* P < 0.01; \* P < 0.05; ns = P > 0.05). Source data are provided as a Source Data file.

**Supplementary Figure 10 Apoptosis in hypoxic *Ahsg* KO kidneys.** **a-c** TUNEL staining on E18.5 kidney sections of normoxic wt (**a**), hypoxic wt (**b**) or hypoxic *Ahsg* KO mice (**c**). The black arrowhead points towards TUNEL positive cells. **d-f** Cleaved caspase-3 on E18.5 kidney sections of hypoxic *Ahsg* KO mice. The white arrowhead highlights a cell with a fragmented nucleus. Images are representative of at least 3 independent experiments. Scale bar = 100  $\mu\text{m}$  (**a-c**) or 50  $\mu\text{m}$  (**d-f**).

**Supplementary Figure 11 Translation of our IUGR mouse model results into a clinical perspective, using KDIGO 2012 classification of CKD.** Mouse data is written in bold. Wt mice (males and females) have no or only a low risk for CKD (green). Normoxic *Ahsg* KO females and hypoxic wt females have a moderate risk for disease (yellow), whereas all remaining males and hypoxic *Ahsg* KO females are staged into a high risk category (orange). F, female; M, male; No, normoxic; Hy, hypoxic; wt, wild type; KO, *Ahsg* KO.

**Supplementary Figure 12 FACS gating strategy.** Strategy used to gate the cells.

## Supplementary Tables

**Supplementary Table 1** Induced genes (Hypoxia vs. Control groups).

| Gene symbol | Fold change | Induced by hypoxia           | CPP component |
|-------------|-------------|------------------------------|---------------|
| Ahsg        | 9.12        |                              | $x^{1,2}$     |
| Fgg         | 5.84        | Vij, 2009 <sup>3</sup>       |               |
| Alb         | 5.21        | Suresh, 2018 <sup>4</sup>    | $x^{1,2}$     |
| Apoh        | 5.18        |                              |               |
| Hbb-y       | 4.86        |                              |               |
| Fgb         | 4.21        |                              |               |
| Trf         | 3.95        | Rolfs, 1997 <sup>5</sup>     | $x^{1,2}$     |
| Pzp         | 3.93        |                              |               |
| Apoa2       | 3.79        |                              | $x^{1,2}$     |
| Apoa1       | 3.68        | Padhy, 2013 <sup>6</sup>     | $x^{1,2}$     |
| Kn1         | 3.48        |                              | $x^2$         |
| Angptl3     | 2.97        |                              |               |
| Plg         | 2.91        |                              | $x^2$         |
| F2          | 2.87        | Tripathy, 2013 <sup>7</sup>  | $x^{1,2}$     |
| Serpind1    | 2.64        |                              |               |
| Cps1        | 2.60        |                              |               |
| Rbp4        | 2.58        |                              |               |
| Fga         | 2.56        | Vij, 2009 <sup>3</sup>       | $x^{52}$      |
| Itih3       | 2.50        |                              |               |
| Apoc2       | 2.48        |                              |               |
| Gys2        | 2.46        |                              |               |
| Apob        | 2.45        |                              |               |
| Serpinc1    | 2.41        |                              | $x^{1,2}$     |
| Itih2       | 2.39        |                              |               |
| Hpd         | 2.30        |                              |               |
| Serpina1d   | 2.22        | Wenger, 1995 <sup>8</sup>    | $x^{1,2}$     |
| Hpx         | 2.20        | Tan, 2016 <sup>9</sup>       |               |
| A2m         | 2.18        | Zhang, 2017 <sup>10</sup>    | $x^{1,2}$     |
| C8b         | 2.13        |                              |               |
| Nrn1        | 2.03        | Le Jan, 2006 <sup>11</sup>   |               |
| Serpina3n   | 2.00        | Wenger, 1995 <sup>8</sup>    |               |
| Itih4       | 1.97        |                              |               |
| Hba-x       | 1.96        |                              |               |
| Car1        | 1.96        |                              |               |
| Apof        | 1.94        |                              |               |
| Uox         | 1.84        |                              |               |
| Apoc4       | 1.75        |                              |               |
| Rgn         | 1.75        |                              |               |
| Cirbp       | 1.74        | Wellmann, 2004 <sup>12</sup> |               |
| Apoc1       | 1.70        |                              |               |
| Crp         | 1.70        |                              |               |
| Lect2       | 1.69        |                              |               |
| Scd1        | 1.69        | Zhang, 2014 <sup>13</sup>    |               |
| Pemt        | 1.57        |                              |               |
| Aox3        | 1.52        |                              |               |
| Lcat        | 1.50        |                              |               |
| Vstm2b      | 1.45        |                              |               |

|          |      |                                                          |       |
|----------|------|----------------------------------------------------------|-------|
| Lss      | 1.45 | Hernández, 2009 <sup>14</sup>                            | $x^2$ |
| Tff3     | 1.41 |                                                          |       |
| St6gal2  | 1.41 |                                                          |       |
| Apoa4    | 1.40 | Liangos, 2010 <sup>15</sup><br>Saraf, 2018 <sup>16</sup> |       |
| Hal      | 1.38 |                                                          |       |
| F12      | 1.38 |                                                          |       |
| Akr1c18  | 1.38 | Kelly, 2015 <sup>17</sup>                                |       |
| Marcks11 | 1.37 |                                                          |       |
| Sc4mol   | 1.36 |                                                          |       |
| Hc       | 1.36 |                                                          |       |
| Tubb4    | 1.35 |                                                          |       |
| Zfp395   | 1.33 |                                                          |       |
| Hmgcr    | 1.33 |                                                          |       |
| Itih1    | 1.32 |                                                          |       |
| Txnrd3   | 1.31 |                                                          |       |

**Supplementary Table 2** Repressed genes (Hypoxia vs. Control groups).

| Gene symbol | Fold change |
|-------------|-------------|
| Napsa       | -1.71       |
| Fmo2        | -1.68       |
| Ccl3        | -1.64       |
| Acot11      | -1.59       |
| Pappa2      | -1.59       |
| Slc10a5     | -1.55       |
| Ugt2b37     | -1.54       |
| Pof1b       | -1.53       |
| Cntn4       | -1.53       |
| Lrrc19      | -1.51       |
| Glipr1      | -1.49       |
| Gcet2       | -1.49       |
| Gbp2        | -1.44       |
| C1ra        | -1.44       |
| Kcnj15      | -1.42       |
| Cxcl13      | -1.40       |
| Emr1        | -1.40       |
| Asah2       | -1.40       |
| Zfp760      | -1.38       |
| Scn7a       | -1.38       |
| Xpnpep2     | -1.37       |
| Prkaa2      | -1.36       |
| Pfn3        | -1.35       |
| Dpp7        | -1.34       |
| Slc25a45    | -1.34       |
| Sord        | -1.34       |
| Hsph1       | -1.33       |
| Pdk4        | -1.32       |



**Supplementary Table 3** Functional annotation using standard settings provided by DAVID.

| induced genes (62)   |                                     |       |       |          |                 |
|----------------------|-------------------------------------|-------|-------|----------|-----------------|
| Category             | Term                                | Count | %     | P-Value  | Fold Enrichment |
| UP KEYWORDS          | Secreted                            | 35*   | 57.4% | 2.90E-23 | 7.7             |
| UP TISSUE            | Plasma                              | 16*   | 26.2% | 1.40E-22 | 57.0            |
| UP TISSUE            | Liver                               | 43*   | 70.5% | 6.80E-18 | 3.7             |
| KEGG PATHWAY         | Complement and coagulation cascades | 13    | 21.3% | 3.40E-16 | 35.7            |
| GOTERM MF ALL        | Endopeptidase inhibitor activity    | 13*   | 21.3% | 2.00E-12 | 19.3            |
| GOTERM BP ALL        | Acute inflammatory response         | 10*   | 16.4% | 3.60E-10 | 23.0            |
| UP KEYWORDS          | Lipid transport                     | 7     | 11.5% | 9.90E-08 | 30.6            |
| GOTERM BP ALL        | Acute-phase response                | 6*    | 9.8%  | 4.30E-07 | 38.0            |
| UP KEYWORDS          | Lipid metabolism                    | 10    | 16.4% | 1.40E-06 | 8.9             |
| GOTERM BP ALL        | Regulation of response to stress    | 16*   | 26.2% | 4.40E-06 | 4.0             |
| repressed genes (28) |                                     |       |       |          |                 |
| Category             | Term                                | Count | %     | P-Value  | Fold Enrichment |
| GOTERM BP ALL        | Lymphocyte migration                | 3     | 10.7  | 5.50E-03 | 25.8            |
| GOTERM MF ALL        | Peptidase activity                  | 5     | 17.9  | 1.70E-02 | 4.8             |
| UP TISSUE            | Kidney                              | 9     | 32.1  | 2.30E-02 | 2.4             |

**Supplementary Table 4** qPCR assays and primers.

| TaqMan Gene Expression Assays<br>(ThermoFisher) |               |
|-------------------------------------------------|---------------|
| Gene Symbol                                     | AssayID       |
| 18s                                             | Mm03928990_g1 |
| Ahsg                                            | Mm01145470_m1 |
| Apoa2                                           | Mm00442687_m1 |
| Apoc2                                           | Mm00437571_m1 |
| ApoH                                            | Mm00496516_m1 |
| Fgb                                             | Mm00805336_m1 |
| Fgg                                             | Mm00513575_m1 |
| Gys2                                            | Mm01267381_g1 |

| Universal Probe Library (Roche) |                        |                        |              |
|---------------------------------|------------------------|------------------------|--------------|
| Gene Symbol                     | Forward primer         | Reverse Primer         | Probe Number |
| Acta2                           | actctcttccagccatctttca | atagggtggttctcgaggatgc | 58           |
| Actb                            | ctaaggccaaccgtgaaaag   | accagaggcatacagggaca   | 64           |
| Coll1a1                         | aggcaagcctggtgaaca     | accagggaaacctctctcg    | 80           |
| Col3a1                          | tggaccccaaggtcttcc     | catctgatccagggtttcca   | 64           |
| Col6a1                          | accggttgagcaaggatg     | tccacgtgctcttgcatct    | 5            |
| Fn1                             | tgccctgaagaacaatcaga   | aaccagttggggaagctcat   | 69           |
| Ppia                            | acgccactgtgcgttttc     | ctgcaaacagctcgaagga    | 46           |
| Lama1                           | cccgacaacctcctcttcta   | catctccactgcgagaaagtc  | 74           |
| Tgfb1                           | tggagcaacatgtggaactc   | gtcagcagccggttacca     | 72           |
| Vim                             | gtaccggagacaggtgcagt   | ttctcttccatctcacgcctc  | 1            |

**Supplementary Table 5** Location of putative HREs for the fetuin-A genes of 15 species.

HREs with a relative score >0.9 are shown in red, >0.93 in orange and >0.97 in yellow.

| Cat  |        |            |       |        |          |
|------|--------|------------|-------|--------|----------|
| Site | Score  | Rel. score | Start | Strand | Sequence |
| 1    | 8.275  | 0.91277    | -9791 | -1     | GAACGTGA |
| 2    | 9.739  | 0.95644    | -9703 | 1      | GCACGTGG |
| 3    | 10.232 | 0.97115    | -9703 | -1     | CCACGTGC |
| 4    | 8.984  | 0.93392    | -8483 | -1     | CCACGTGG |
| 5    | 8.984  | 0.93392    | -8483 | 1      | CCACGTGG |
| 6    | 8.295  | 0.91337    | -7932 | 1      | GGGCGTGG |
| 7    | 8.850  | 0.92992    | -4713 | 1      | CCACGTGA |
| 8    | 8.409  | 0.91677    | -1376 | 1      | GAACGTGG |
| 9    | 9.951  | 0.96277    | -148  | -1     | GGACGTGG |
| 10   | 8.409  | 0.91677    | 150   | -1     | GAACGTGG |
| 11   | 9.605  | 0.95245    | 1086  | -1     | GCACGTGA |
| 12   | 8.161  | 0.90937    | 2537  | 1      | GGGCGTGA |
| 13   | 9.739  | 0.95644    | 2671  | -1     | GCACGTGG |
| 14   | 10.232 | 0.97115    | 2671  | 1      | CCACGTGC |
| 15   | 9.148  | 0.93881    | 3007  | -1     | AGACGTGG |
| 16   | 8.664  | 0.92437    | 3604  | -1     | CTGCGTGC |
| 17   | 9.148  | 0.93881    | 4038  | -1     | AGACGTGG |
| 18   | 8.850  | 0.92992    | 4502  | -1     | CCACGTGA |
| 19   | 9.148  | 0.93881    | 4979  | -1     | AGACGTGG |
| 20   | 8.984  | 0.93392    | 6976  | -1     | CCACGTGG |
| 21   | 8.984  | 0.93392    | 6976  | 1      | CCACGTGG |
| 22   | 10.987 | 0.99367    | 8812  | -1     | GCACGTGC |
| 23   | 10.987 | 0.99367    | 8812  | 1      | GCACGTGC |
| 24   | 9.196  | 0.94024    | 9487  | 1      | CGACGTGG |

  

| Human |        |            |       |        |          |
|-------|--------|------------|-------|--------|----------|
| Site  | Score  | Rel. score | Start | Strand | Sequence |
| 1     | 8.037  | 0.90567    | -6273 | 1      | GTGCGTGA |
| 2     | 9.148  | 0.93881    | -3959 | -1     | AGACGTGG |
| 3     | 9.605  | 0.95245    | -3186 | 1      | GCACGTGA |
| 4     | 8.295  | 0.91337    | -2413 | -1     | GGGCGTGG |
| 5     | 8.295  | 0.91337    | -1762 | -1     | GGGCGTGG |
| 6     | 8.740  | 0.92664    | -30   | -1     | AGGCGTGC |
| 7     | 8.891  | 0.93115    | 556   | -1     | ATACGTGA |
| 8     | 9.951  | 0.96277    | 2912  | 1      | GGACGTGG |
| 9     | 8.850  | 0.92992    | 3280  | -1     | CCACGTGA |
| 10    | 11.199 | 1.00000    | 4056  | 1      | GGACGTGC |
| 11    | 8.788  | 0.92807    | 4119  | -1     | CGGCGTGC |
| 12    | 9.828  | 0.95910    | 4269  | 1      | GTACGTGG |
| 13    | 9.196  | 0.94024    | 4526  | -1     | CGACGTGG |
| 14    | 8.161  | 0.90937    | 5749  | -1     | GGGCGTGA |
| 15    | 9.419  | 0.94690    | 8512  | 1      | GTGCGTGC |
| 16    | 9.014  | 0.93482    | 9651  | 1      | AGACGTGA |

  

| Mouse |        |            |       |        |          |
|-------|--------|------------|-------|--------|----------|
| Site  | Score  | Rel. score | Start | Strand | Sequence |
| 1     | 8.575  | 0.92172    | -7181 | 1      | CCGCGTGC |
| 2     | 8.409  | 0.91677    | -3376 | 1      | GAACGTGG |
| 3     | 9.196  | 0.94024    | -2167 | -1     | CGACGTGG |
| 4     | 8.850  | 0.92992    | -390  | -1     | CCACGTGA |
| 5     | 10.321 | 0.97381    | 1386  | 1      | CTACGTGC |
| 6     | 9.605  | 0.95245    | 2318  | 1      | GCACGTGA |
| 7     | 8.711  | 0.92578    | 4143  | -1     | CTACGTGT |
| 8     | 8.936  | 0.93249    | 4368  | -1     | ACACGTGG |
| 9     | 8.623  | 0.92315    | 4368  | 1      | CCACGTGT |
| 10    | 8.575  | 0.92172    | 9190  | -1     | ACACGTGT |
| 11    | 8.575  | 0.92172    | 9190  | 1      | ACACGTGT |

  

| Chicken |       |            |       |        |          |
|---------|-------|------------|-------|--------|----------|
| Site    | Score | Rel. score | Start | Strand | Sequence |
| 1       | 8.616 | 0.92294    | -9959 | -1     | ATGCGTGC |
| 2       | 8.711 | 0.92578    | -6227 | -1     | CTACGTGT |
| 3       | 9.148 | 0.93881    | -4055 | 1      | AGACGTGG |
| 4       | 8.047 | 0.90597    | -3633 | 1      | GAACGTGT |
| 5       | 9.014 | 0.93482    | -3076 | 1      | AGACGTGA |
| 6       | 8.854 | 0.93004    | -363  | -1     | AAACGTGC |
| 7       | 8.575 | 0.92172    | 189   | 1      | CCGCGTGC |
| 8       | 8.984 | 0.93392    | 5197  | -1     | CCACGTGG |
| 9       | 8.984 | 0.93392    | 5197  | 1      | CCACGTGG |
| 10      | 8.663 | 0.92434    | 6173  | -1     | ATACGTGT |

  

| Chimp |       |            |       |        |          |
|-------|-------|------------|-------|--------|----------|
| Site  | Score | Rel. score | Start | Strand | Sequence |
| 1     | 8.037 | 0.90567    | -6262 | 1      | GTGCGTGA |
| 2     | 9.148 | 0.93881    | -3952 | -1     | AGACGTGG |
| 3     | 9.605 | 0.95245    | -3178 | 1      | GCACGTGA |
| 4     | 8.295 | 0.91337    | -2429 | -1     | GGGCGTGG |
| 5     | 8.295 | 0.91337    | -1774 | -1     | GGGCGTGG |
| 6     | 8.740 | 0.92664    | -30   | -1     | AGGCGTGC |
| 7     | 8.984 | 0.93392    | 58    | -1     | CCACGTGG |
| 8     | 8.984 | 0.93392    | 58    | 1      | CCACGTGG |

  

| Pig  |        |            |       |        |          |
|------|--------|------------|-------|--------|----------|
| Site | Score  | Rel. score | Start | Strand | Sequence |
| 1    | 9.466  | 0.94830    | -6362 | -1     | GTACGTGT |
| 2    | 9.739  | 0.95644    | -1879 | 1      | GCACGTGG |
| 3    | 10.232 | 0.97115    | -1879 | -1     | CCACGTGC |
| 4    | 8.788  | 0.92807    | -464  | 1      | CGGCGTGC |
| 5    | 8.295  | 0.91337    | 2185  | -1     | GGGCGTGG |
| 6    | 9.739  | 0.95644    | 2780  | -1     | GCACGTGG |
| 7    | 10.232 | 0.97115    | 2780  | 1      | CCACGTGC |
| 8    | 10.321 | 0.97381    | 3020  | 1      | CTACGTGC |
| 9    | 8.984  | 0.93392    | 6520  | -1     | CCACGTGG |
| 10   | 8.984  | 0.93392    | 6520  | 1      | CCACGTGG |
| 11   | 8.275  | 0.91277    | 7140  | 1      | GAACGTGA |
| 12   | 8.854  | 0.93004    | 7165  | -1     | AAACGTGC |

  

| Rabbit |       |            |       |        |          |
|--------|-------|------------|-------|--------|----------|
| Site   | Score | Rel. score | Start | Strand | Sequence |

|    |        |         |      |    |          |
|----|--------|---------|------|----|----------|
| 9  | 9.828  | 0.95910 | 250  | 1  | GTACGTGG |
| 10 | 8.891  | 0.93115 | 556  | -1 | ATACGTGA |
| 11 | 8.902  | 0.93147 | 2810 | -1 | CAACGTGC |
| 12 | 9.951  | 0.96277 | 2916 | 1  | GGACGTGG |
| 13 | 8.850  | 0.92992 | 3281 | -1 | CCACGTGA |
| 14 | 11.199 | 1.00000 | 4057 | 1  | GGACGTGC |
| 15 | 8.788  | 0.92807 | 4120 | -1 | CGGCGTGC |
| 16 | 9.828  | 0.95910 | 4270 | 1  | GTACGTGG |
| 17 | 9.196  | 0.94024 | 4527 | -1 | CGACGTGG |
| 18 | 8.161  | 0.90937 | 5750 | -1 | GGGCGTGA |
| 19 | 9.419  | 0.94690 | 8525 | 1  | GTGCGTGC |
| 20 | 9.014  | 0.93482 | 9665 | 1  | AGACGTGA |

|    |        |         |       |    |          |
|----|--------|---------|-------|----|----------|
| 1  | 8.575  | 0.92172 | -9898 | 1  | CCGCGTGC |
| 2  | 8.854  | 0.93004 | -4033 | -1 | AAACGTGC |
| 3  | 8.984  | 0.93392 | -2804 | -1 | CCACGTGG |
| 4  | 8.984  | 0.93392 | -2804 | 1  | CCACGTGG |
| 5  | 8.788  | 0.92807 | -1640 | -1 | CGGCGTGC |
| 6  | 8.161  | 0.90937 | 653   | -1 | GGGCGTGA |
| 7  | 8.939  | 0.93258 | 1709  | 1  | CTACGTGA |
| 8  | 8.295  | 0.91337 | 2190  | -1 | GGGCGTGG |
| 9  | 8.171  | 0.90967 | 2327  | -1 | GTGCGTGG |
| 10 | 9.951  | 0.96277 | 3402  | -1 | GGACGTGG |
| 11 | 9.377  | 0.94564 | 4726  | 1  | GCACGTGT |
| 12 | 10.184 | 0.96972 | 4726  | -1 | ACACGTGC |
| 13 | 9.073  | 0.93658 | 4754  | 1  | CTACGTGG |
| 14 | 9.657  | 0.95400 | 6992  | 1  | GAACGTGC |
| 15 | 9.739  | 0.95644 | 7020  | 1  | GCACGTGG |
| 16 | 10.232 | 0.97115 | 7020  | -1 | CCACGTGC |
| 17 | 9.014  | 0.93482 | 7081  | -1 | AGACGTGA |
| 18 | 8.575  | 0.92172 | 8660  | -1 | CCGCGTGC |

| Cow  |        |            |       |        |          |
|------|--------|------------|-------|--------|----------|
| Site | Score  | Rel. score | Start | Strand | Sequence |
| 1    | 9.739  | 0.95644    | -9399 | -1     | GCACGTGG |
| 2    | 10.232 | 0.97115    | -9399 | 1      | CCACGTGC |
| 3    | 8.275  | 0.91277    | -7624 | 1      | GAACGTGA |
| 4    | 8.295  | 0.91337    | -2242 | 1      | GGGCGTGG |
| 5    | 9.025  | 0.93514    | -1847 | -1     | ATACGTGG |
| 6    | 8.575  | 0.92172    | -1077 | 1      | CCGCGTGC |
| 7    | 9.828  | 0.95910    | 2370  | -1     | GTACGTGG |
| 8    | 8.295  | 0.91337    | 2384  | -1     | GGGCGTGG |
| 9    | 9.605  | 0.95245    | 2424  | 1      | GCACGTGA |
| 10   | 8.295  | 0.91337    | 2656  | -1     | GGGCGTGG |
| 11   | 9.014  | 0.93482    | 2694  | 1      | AGACGTGA |
| 12   | 9.739  | 0.95644    | 2768  | -1     | GCACGTGG |
| 13   | 10.232 | 0.97115    | 2768  | 1      | CCACGTGC |
| 14   | 11.199 | 1.00000    | 3206  | 1      | GGACGTGC |
| 15   | 8.664  | 0.92437    | 3269  | -1     | CTGCGTGC |
| 16   | 8.409  | 0.91677    | 3414  | 1      | GAACGTGG |
| 17   | 8.854  | 0.93004    | 4390  | -1     | AAACGTGC |
| 18   | 8.939  | 0.93258    | 4417  | 1      | CTACGTGA |
| 19   | 8.902  | 0.93147    | 5570  | -1     | CAACGTGC |
| 20   | 8.984  | 0.93392    | 6443  | -1     | CCACGTGG |
| 21   | 8.984  | 0.93392    | 6443  | 1      | CCACGTGG |
| 22   | 8.802  | 0.92849    | 6941  | -1     | ACACGTGA |
| 23   | 9.817  | 0.95877    | 7287  | -1     | GGACGTGA |
| 24   | 10.987 | 0.99367    | 9222  | -1     | GCACGTGC |
| 25   | 10.987 | 0.99367    | 9222  | 1      | GCACGTGC |
| 26   | 9.657  | 0.95400    | 9333  | -1     | GAACGTGC |

| Rat  |        |            |       |        |          |
|------|--------|------------|-------|--------|----------|
| Site | Score  | Rel. score | Start | Strand | Sequence |
| 1    | 7.933  | 0.90257    | 2510  | -1     | GGGCGTGT |
| 2    | 8.902  | 0.93147    | 3739  | 1      | CAACGTGC |
| 3    | 10.184 | 0.96972    | 4487  | -1     | ACACGTGC |
| 4    | 9.377  | 0.94564    | 4487  | 1      | GCACGTGT |
| 5    | 10.396 | 0.97604    | 6401  | 1      | AGACGTGC |
| 6    | 8.000  | 0.90456    | 6587  | -1     | GAGCGTGC |
| 7    | 9.073  | 0.93658    | 6887  | -1     | CTACGTGG |
| 8    | 9.542  | 0.95057    | 8038  | -1     | GGGCGTGC |
| 9    | 9.148  | 0.93881    | 9238  | 1      | AGACGTGG |
| 10   | 9.419  | 0.94690    | 9333  | 1      | GTGCGTGC |
| 11   | 9.014  | 0.93482    | 9955  | -1     | AGACGTGA |

| Dog  |       |            |       |        |          |
|------|-------|------------|-------|--------|----------|
| Site | Score | Rel. score | Start | Strand | Sequence |
| 1    | 9.196 | 0.94024    | -8321 | 1      | CGACGTGG |
| 2    | 9.951 | 0.96277    | -4021 | -1     | GGACGTGG |
| 3    | 8.409 | 0.91677    | -310  | -1     | GAACGTGG |
| 4    | 9.951 | 0.96277    | -149  | -1     | GGACGTGG |
| 5    | 8.409 | 0.91677    | 150   | -1     | GAACGTGG |
| 6    | 8.835 | 0.92948    | 1391  | 1      | CGACGTGT |
| 7    | 8.295 | 0.91337    | 2508  | -1     | GGGCGTGG |
| 8    | 9.148 | 0.93881    | 2824  | -1     | AGACGTGG |
| 9    | 8.295 | 0.91337    | 3321  | 1      | GGGCGTGG |

| Sheep |        |            |       |        |          |
|-------|--------|------------|-------|--------|----------|
| Site  | Score  | Rel. score | Start | Strand | Sequence |
| 1     | 11.199 | 1.00000    | -9703 | 1      | GGACGTGC |
| 2     | 9.739  | 0.95644    | -9385 | -1     | GCACGTGG |
| 3     | 10.232 | 0.97115    | -9385 | 1      | CCACGTGC |
| 4     | 8.623  | 0.92315    | -8196 | -1     | CCACGTGT |
| 5     | 8.936  | 0.93249    | -8196 | 1      | ACACGTGG |
| 6     | 8.275  | 0.91277    | -7591 | 1      | GAACGTGA |
| 7     | 11.199 | 1.00000    | 1103  | 1      | GGACGTGC |
| 8     | 9.828  | 0.95910    | 2340  | -1     | GTACGTGG |
| 9     | 8.295  | 0.91337    | 2354  | -1     | GGGCGTGG |
| 10    | 9.605  | 0.95245    | 2394  | 1      | GCACGTGA |
| 11    | 8.295  | 0.91337    | 2591  | -1     | GGGCGTGG |
| 12    | 9.739  | 0.95644    | 2703  | -1     | GCACGTGG |
| 13    | 10.232 | 0.97115    | 2703  | 1      | CCACGTGC |
| 14    | 9.817  | 0.95877    | 3157  | -1     | GGACGTGA |
| 15    | 11.199 | 1.00000    | 3311  | 1      | GGACGTGC |
| 16    | 8.788  | 0.92807    | 3374  | -1     | CGGCGTGC |
| 17    | 8.409  | 0.91677    | 3519  | 1      | GAACGTGG |
| 18    | 8.939  | 0.93258    | 4530  | 1      | CTACGTGA |

|    |        |         |      |    |          |
|----|--------|---------|------|----|----------|
| 10 | 11.199 | 1.00000 | 3397 | 1  | GGACGTGC |
| 11 | 8.788  | 0.92807 | 3460 | -1 | CGGCGTGC |
| 12 | 9.951  | 0.96277 | 3944 | -1 | GGACGTGG |
| 13 | 8.000  | 0.90456 | 4919 | 1  | GAGCGTGC |
| 14 | 9.025  | 0.93514 | 5038 | -1 | ATACGTGG |
| 15 | 8.295  | 0.91337 | 6587 | 1  | GGGCGTGG |
| 16 | 11.199 | 1.00000 | 7863 | 1  | GGACGTGC |
| 17 | 10.396 | 0.97604 | 8913 | -1 | AGACGTGC |
| 18 | 9.739  | 0.95644 | 9035 | 1  | GCACGTGG |
| 19 | 10.232 | 0.97115 | 9035 | -1 | CCACGTGC |

|    |        |         |      |    |          |
|----|--------|---------|------|----|----------|
| 19 | 8.984  | 0.93392 | 6589 | -1 | CCACGTGG |
| 20 | 8.984  | 0.93392 | 6589 | 1  | CCACGTGG |
| 21 | 8.787  | 0.92804 | 8640 | 1  | AGACGTGT |
| 22 | 9.377  | 0.94564 | 8662 | -1 | GCACGTGT |
| 23 | 10.184 | 0.96972 | 8662 | 1  | ACACGTGC |

| Ghost shark |        |            |       |        |          |
|-------------|--------|------------|-------|--------|----------|
| Site        | Score  | Rel. score | Start | Strand | Sequence |
| 1           | 9.062  | 0.93625    | -9459 | 1      | CGACGTGA |
| 2           | 8.037  | 0.90567    | -8059 | -1     | GTGCGTGA |
| 3           | 8.623  | 0.92315    | -4328 | -1     | CCACGTGT |
| 4           | 8.936  | 0.93249    | -4328 | 1      | ACACGTGG |
| 5           | 8.787  | 0.92804    | -3823 | 1      | AGACGTGT |
| 6           | 9.377  | 0.94564    | -2892 | -1     | GCACGTGT |
| 7           | 10.184 | 0.96972    | -2892 | 1      | ACACGTGC |
| 8           | 8.663  | 0.92434    | 1695  | -1     | ATACGTGT |
| 9           | 9.014  | 0.93482    | 2970  | 1      | AGACGTGA |
| 10          | 9.466  | 0.94830    | 3273  | -1     | GTACGTGT |
| 11          | 8.161  | 0.90937    | 4639  | 1      | GGGCGTGA |
| 12          | 8.275  | 0.91277    | 5381  | -1     | GAACGTGA |
| 13          | 10.396 | 0.97604    | 5530  | -1     | AGACGTGC |
| 14          | 10.396 | 0.97604    | 7044  | -1     | AGACGTGC |
| 15          | 9.739  | 0.95644    | 7115  | -1     | GCACGTGG |
| 16          | 10.232 | 0.97115    | 7115  | 1      | CCACGTGC |
| 17          | 8.047  | 0.90597    | 7684  | 1      | GAACGTGT |
| 18          | 9.062  | 0.93625    | 8196  | -1     | CGACGTGA |
| 19          | 8.664  | 0.92437    | 9888  | -1     | CTGCGTGC |

| Xenopus |        |            |       |        |          |
|---------|--------|------------|-------|--------|----------|
| Site    | Score  | Rel. score | Start | Strand | Sequence |
| 1       | 8.171  | 0.90967    | -5880 | 1      | GTGCGTGG |
| 2       | 9.466  | 0.94830    | -3541 | 1      | GTACGTGT |
| 3       | 9.739  | 0.95644    | 223   | 1      | GCACGTGG |
| 4       | 10.232 | 0.97115    | 223   | -1     | CCACGTGC |
| 5       | 8.711  | 0.92578    | 1837  | -1     | CTACGTGT |
| 6       | 9.377  | 0.94564    | 2416  | 1      | GCACGTGT |
| 7       | 10.184 | 0.96972    | 2416  | -1     | ACACGTGC |
| 8       | 9.419  | 0.94690    | 6455  | 1      | GTGCGTGC |
| 9       | 9.739  | 0.95644    | 7947  | 1      | GCACGTGG |
| 10      | 10.232 | 0.97115    | 7947  | -1     | CCACGTGC |
| 11      | 8.850  | 0.92992    | 8780  | -1     | CCACGTGA |
| 12      | 9.605  | 0.95245    | 9031  | -1     | GCACGTGA |
| 13      | 8.711  | 0.92578    | 9180  | 1      | CTACGTGT |
| 14      | 10.396 | 0.97604    | 9707  | -1     | AGACGTGC |

| Zebrafish 1 |       |            |       |        |          |
|-------------|-------|------------|-------|--------|----------|
| Site        | Score | Rel. score | Start | Strand | Sequence |
| 1           | 9.148 | 0.93881    | -9246 | -1     | AGACGTGG |
| 2           | 8.891 | 0.93115    | -7075 | 1      | ATACGTGA |
| 3           | 9.694 | 0.95510    | -2150 | 1      | GTACGTGA |
| 4           | 7.933 | 0.90257    | -1072 | -1     | GGGCGTGT |
| 5           | 8.295 | 0.91337    | -532  | -1     | GGGCGTGG |
| 6           | 9.817 | 0.95877    | 2510  | 1      | GGACGTGA |
| 7           | 9.542 | 0.95057    | 9670  | -1     | GGGCGTGC |

| Horse |        |            |       |        |          |
|-------|--------|------------|-------|--------|----------|
| Site  | Score  | Rel. score | Start | Strand | Sequence |
| 1     | 9.605  | 0.95245    | -6498 | -1     | GCACGTGA |
| 2     | 11.199 | 1.00000    | -2058 | 1      | GGACGTGC |
| 3     | 8.575  | 0.92172    | -559  | -1     | ACACGTGT |
| 4     | 8.575  | 0.92172    | -559  | 1      | ACACGTGT |
| 5     | 8.409  | 0.91677    | -293  | -1     | GAACGTGG |
| 6     | 10.396 | 0.97604    | 171   | -1     | AGACGTGC |
| 7     | 8.295  | 0.91337    | 2505  | -1     | GGGCGTGG |
| 8     | 9.605  | 0.95245    | 2545  | 1      | GCACGTGA |
| 9     | 11.199 | 1.00000    | 3299  | 1      | GGACGTGC |
| 10    | 8.788  | 0.92807    | 3362  | -1     | CGGCGTGC |
| 11    | 9.828  | 0.95910    | 3505  | 1      | GTACGTGG |
| 12    | 8.984  | 0.93392    | 6636  | -1     | CCACGTGG |
| 13    | 8.984  | 0.93392    | 6636  | 1      | CCACGTGG |
| 14    | 9.148  | 0.93881    | 6792  | -1     | AGACGTGG |
| 15    | 8.984  | 0.93392    | 6840  | -1     | CCACGTGG |
| 16    | 8.984  | 0.93392    | 6840  | 1      | CCACGTGG |
| 17    | 9.073  | 0.93658    | 7917  | -1     | CTACGTGG |

| Zebrafish 2 |       |            |       |        |          |
|-------------|-------|------------|-------|--------|----------|
| Site        | Score | Rel. score | Start | Strand | Sequence |
| 1           | 8.575 | 0.92172    | -9260 | -1     | CCGCGTGC |
| 2           | 8.575 | 0.92172    | -6523 | -1     | ACACGTGT |
| 3           | 8.575 | 0.92172    | -6523 | 1      | ACACGTGT |
| 4           | 8.663 | 0.92434    | 1373  | -1     | ATACGTGT |
| 5           | 8.711 | 0.92578    | 1406  | 1      | CTACGTGT |
| 6           | 9.014 | 0.93482    | 1413  | -1     | AGACGTGA |
| 7           | 8.295 | 0.91337    | 3945  | 1      | GGGCGTGG |
| 8           | 8.037 | 0.90567    | 4012  | -1     | GTGCGTGA |
| 9           | 7.933 | 0.90257    | 4274  | 1      | GGGCGTGT |
| 10          | 8.295 | 0.91337    | 4732  | 1      | GGGCGTGG |
| 11          | 8.037 | 0.90567    | 4799  | -1     | GTGCGTGA |
| 12          | 7.933 | 0.90257    | 5061  | 1      | GGGCGTGT |
| 13          | 7.933 | 0.90257    | 5368  | 1      | GGGCGTGT |
| 14          | 9.542 | 0.95057    | 6794  | -1     | GGGCGTGC |
| 15          | 9.419 | 0.94690    | 8115  | -1     | GTGCGTGC |
| 16          | 9.419 | 0.94690    | 8119  | -1     | GTGCGTGC |
| 17          | 9.330 | 0.94424    | 8123  | -1     | GCGCGTGC |
| 18          | 8.663 | 0.92434    | 9593  | 1      | ATACGTGT |

**Supplementary Table 6** Primer and fragment sequences used for molecular cloning.

|                                                                                                                                                                                                                                                                                                                                                                                                                                                                                                                                                    |                               |
|----------------------------------------------------------------------------------------------------------------------------------------------------------------------------------------------------------------------------------------------------------------------------------------------------------------------------------------------------------------------------------------------------------------------------------------------------------------------------------------------------------------------------------------------------|-------------------------------|
| <b>mouse <i>Ahsg</i> 500bp promoter fragment</b>                                                                                                                                                                                                                                                                                                                                                                                                                                                                                                   |                               |
| GCTCCGGAGATTGGGAAC TTGTTCC TCTCAGCAAGCTTTGCCACACTGCATGGAGATCCGTGTGCGTACAGAGC<br>ACTGTTACCCCCATCATGACATGAGCGCTCAGGGAAAGCGCACACAAGTCAATCAAATAACAGAGGTGCACCAC<br>AGGATTACACAGAGTCC TTACAGAAGTGT TTTAAGCCTTTTCAATCACATGAAGCAATATTCACATGATAGTGC<br>TAAATGGAAAAGGAAACAGCTACACGCTTC TATTTGGTACAGAGAAGTGAGGTGTGTGGTTAAGAGCGACTGCT<br>ATCTCTCC TCTCACCACGTCGCTGGGGGAGAGACAGCCAACCGCTAGCTTAAATGCCACTGTTTGT TACTACTGC<br>TATCTTGGTTTCCACCCCCCATGTGAAATTTCA TTTTGATAGCATT TAAATCTCTCCCCAGGCAGACAGGTGTA<br>GCACTGGGAGATGCTCCCGAGTGGCTGGCTGGCTGGCTGGCTGGCAGACC   |                               |
| <b>mouse <i>Ahsg</i> 500bp promoter fragment mutated</b>                                                                                                                                                                                                                                                                                                                                                                                                                                                                                           |                               |
| GCTCCGGAGATTGGGAAC TTGTTCC TCTCAGCAAGCTTTGCCACACTGCATGGAGATCCGTGTGCGTACAGAGC<br>ACTGTTACCCCCATCATGACATGAGCGCTCAGGGAAAGCGCACACAAGTCAATCAAATAACAGAGGTGCACCAC<br>AGGATTACACAGAGTCC TTACAGAAGTGT TTTAAGCCTTTTCAATCACATGAAGCAATATTCACATGATAGTGC<br>TAAATGGAAAAGGAAACAGCTACACGCTTC TATTTGGTACAGAGAAGTGAGGTGTGTGGTTAAGAGCGACTGCT<br>ATCTCTCC TCTCACCATAA TAGCTGGGGGAGAGACAGCCAACCGCTAGCTTAAATGCCACTGTTTGT TACTACTGC<br>TATCTTGGTTTCCACCCCCCATGTGAAATTTCA TTTTGATAGCATT TAAATCTCTCCCCAGGCAGACAGGTGTA<br>GCACTGGGAGATGCTCCCGAGTGGCTGGCTGGCTGGCTGGCTGGCAGACC |                               |
| <b>mouse <i>Ahsg</i> 500bp fragment of intronic sequences</b>                                                                                                                                                                                                                                                                                                                                                                                                                                                                                      |                               |
| TGCTGAAGGGAAAGCCGTGAGCGAGCACTGTGCATGTGCTACG TGC T GATTGTGAGATGCTCATTATGGGATGC<br>CCGAGTGGATCAAGAAGTCC TAGGACCCCACCCCGCTGGCAA ACTGTTCTGTGAGGCAGCTGACTGAGCAGCTG<br>AGTGC TGCTTGTGGTTGGTTGGTGGGTGGGTGGGTGGGTGGGAGCTAGCAACTCAATCCTTCCAATTGCCAG<br>GGCCACACGTAGTCCGTGTGGATTTGTGTTCTCTCAA ACTGTGCCAGACCATAGCTTCTCCTCTCCATCCCTCC<br>CACCTCCCTCTTACCTTCCCTCCCTCCCTCCCTCCCTCCCTCCCTCCCTCCCTCCCTCTCTGTCACTTC<br>CTCCCTCTATCCACCTCTCCTTCCCCCTCCCTCCCTCTGTCCCACCTCTTCTTGCCCCCTCTTGTTCAGACC<br>ATCTTTCCACG TGTCTCATT TTTCA TTTCTCAGCCTCTCCCAGT                  |                               |
| <b>mouse <i>Ahsg</i> 500bp fragment of intronic sequences mutated</b>                                                                                                                                                                                                                                                                                                                                                                                                                                                                              |                               |
| TGCTGAAGGGAAAGCCGTGAGCGAGCACTGTGCATGTGCTACG TGC T AATAA T GATTGTGAGATGCTCATTATGGGATGC<br>CCGAGTGGATCAAGAAGTCC TAGGACCCCACCCCGCTGGCAA ACTGTTCTGTGAGGCAGCTGACTGATAAATAAG<br>AGTGC TGCTTGTGGTTGGTTGGTGGGTGGGTGGGTGGGTGGGAGCTAGCAACTCAATCCTTCCAATTGCCAG<br>GGCCAATAA TAGTCCGTGTGGATTTGTGTTCTCTCAA ACTGTGCCAGACCATAGCTTCTCCTCTCCATCCCTCC<br>CACCTCCCTCTTACCTTCCCTCCCTCCCTCCCTCCCTCCCTCCCTCCCTCCCTCTCTGTCACTTC<br>CTCCCTCTATCCACCTCTCCTTCCCCCTCCCTCCCTCTGTCCCACCTCTTCTTGCCCCCTCTTGTTCAGACC<br>ATCTTTTAATAA TATCTCATT TTTCA TTTCTCAGCCTCTCCCAGT           |                               |
| <b>mouse <i>Ahsg</i> 2.5kb promoter fragment</b>                                                                                                                                                                                                                                                                                                                                                                                                                                                                                                   |                               |
| Forward Primer                                                                                                                                                                                                                                                                                                                                                                                                                                                                                                                                     | atagagctccggagattggaacttgt    |
| Reverse Primer                                                                                                                                                                                                                                                                                                                                                                                                                                                                                                                                     | aaaagaattcatggttgctccagagaggc |

**Supplementary Table 7** Primary and secondary antibodies.

| Target/protein            | Primary antibodies |           |             |                                 |
|---------------------------|--------------------|-----------|-------------|---------------------------------|
|                           | Host species       | Clonality | Application | Source                          |
| Alpha smooth muscle actin | rabbit             | mono      | WB          | Abcam, ab32575                  |
| Aquaporin-1               | rabbit             | poly      | IF          | SCBT, sc-20810                  |
| Aquaporin-2               | rabbit             | poly      | IF          | J. Loffing <sup>18</sup>        |
| Beta actin                | rabbit             | poly      | WB          | Abcam, ab8227                   |
| Caspase-3 (cleaved)       | rabbit             | poly      | IF          | Cell Signaling, 9661S           |
| CD11b-PE                  | rat                | mono      | FACS        | eBioscience, 12-0112-82         |
| CD11c-BV 605              | hamster            | mono      | FACS        | BioLegend, 117333               |
| CD68-APC-Cy7              | rat                | mono      | FACS        | BioLegend, 137024               |
| CD80-Pacific blue         | hamster            | mono      | FACS        | BioLegend, 104723               |
| CD86-APC                  | rat                | mono      | FACS        | BioLegend, 105011               |
| CD206-FITC                | rat                | mono      | FACS        | BioLegend, 141703               |
| Collagen 1                | mouse              | mono      | WB          | SCBT, sc-293182                 |
| F4/80-PE-Cy7              | rat                | mono      | FACS        | BioLegend, 123114               |
| Fetuin-A                  | goat               | poly      | IF, WB      | SCBT, sc-9668                   |
| Fetuin-A                  | rabbit             | poly      | WB          | W. Jahnen-Dechent <sup>19</sup> |
| Fetuin-A                  | rabbit             | mono      | IF, IHC     | Sino Biological, 50093-R022     |

| Fibronectin          | mouse        | mono                       | WB          | SCBT, sc-73611           |
|----------------------|--------------|----------------------------|-------------|--------------------------|
| Ncc                  | rabbit       | poly                       | IF          | J. Loffing <sup>20</sup> |
| Nephrin              | goat         | poly                       | IF          | R&D, AF3159              |
| Nkcc2                | rabbit       | poly                       | IF          | J. Loffing <sup>18</sup> |
| Phospho-Smad3        | rabbit       | mono                       | WB          | Cell Signaling, 9520S    |
| Smad3                | mouse        | mono                       | WB          | SCBT, sc-101154          |
| Vimentin             | rabbit       | mono                       | WB          | Cell Signaling, 5741T    |
| Secondary antibodies |              |                            |             |                          |
| Target               | Host species | Conjugate                  | Application | Source                   |
| goat                 | donkey       | Alexa Fluor® 647           | IF          | Jackson, 705-605-147     |
| goat                 | donkey       | Cyanine Cy <sup>TM</sup> 2 | IF          | Jackson, 705-225-147     |
| goat                 | donkey       | HRP                        | WB          | Jackson, 705-035-147     |
| goat                 | donkey       | HRP                        | IHC         | SCBT, sc-2304            |
| mouse                | goat         | HRP polymer                | IHC         | Agilent, K4001           |
| mouse                | donkey       | HRP                        | WB          | Jackson, 715-035-151     |
| rabbit               | goat         | HRP polymer                | IHC         | Agilent, K4003           |
| rabbit               | donkey       | Cyanine Cy <sup>TM</sup> 3 | IF          | Jackson, 711-165-152     |
| rabbit               | donkey       | HRP                        | WB          | Jackson, 711-035-152     |
| rat                  | donkey       | Alexa Fluor® 647           | IF          | Jackson, 712-606-153     |

**Supplementary Table 8** P-values for postnatal growth curve (Figure 1g).

| Postnatal day | No wt vs. No KO<br>(whites circles) | Hy wt vs. Hy KO<br>(grey circles) | No wt vs. Hy wt<br>(small asterisks) | No KO vs. Hy KO<br>(large asterisks) |
|---------------|-------------------------------------|-----------------------------------|--------------------------------------|--------------------------------------|
| 1             | 0.1171                              | <b>0.0795</b>                     | <b>&lt; 0.0001</b>                   | <b>&lt; 0.0001</b>                   |
| 2             | 0.2810                              | <b>&lt; 0.0001</b>                | <b>0.0002</b>                        | <b>&lt; 0.0001</b>                   |
| 3             | 0.4101                              | <b>&lt; 0.0001</b>                | <b>0.0311</b>                        | <b>&lt; 0.0001</b>                   |
| 4             | 0.6130                              | <b>0.0001</b>                     | 0.9948                               | <b>0.0003</b>                        |
| 5             | 0.3534                              | <b>&lt; 0.0001</b>                | 0.6691                               | <b>&lt; 0.0001</b>                   |
| 6             | 0.2508                              | <b>&lt; 0.0001</b>                | 0.7768                               | <b>0.0004</b>                        |
| 7             | 0.4692                              | <b>0.0005</b>                     | 0.8715                               | <b>0.0123</b>                        |
| 8             | 0.3583                              | <b>&lt; 0.0001</b>                | 0.4804                               | <b>0.0223</b>                        |
| 9             | 0.1710                              | <b>0.0020</b>                     | 0.6816                               | 0.3367                               |
| 10            | 0.1132                              | <b>0.0014</b>                     | 0.4091                               | 0.7761                               |
| 11            | 0.1306                              | <b>0.0027</b>                     | 0.2492                               | 0.5394                               |
| 12            | 0.1143                              | <b>0.0040</b>                     | 0.3040                               | 0.2352                               |
| 13            | 0.1195                              | <b>0.0020</b>                     | 0.1998                               | 0.1429                               |
| 14            | 0.0763                              | <b>0.0023</b>                     | 0.1502                               | <b>0.0368</b>                        |
| 15            | 0.0918                              | <b>0.0047</b>                     | 0.1509                               | <b>0.0324</b>                        |
| 16            | 0.0777                              | <b>0.0103</b>                     | 0.1169                               | <b>0.0059</b>                        |
| 17            | 0.0897                              | <b>0.0067</b>                     | 0.0567                               | <b>0.0054</b>                        |
| 18            | 0.0798                              | <b>0.0067</b>                     | <b>0.0434</b>                        | <b>0.0013</b>                        |
| 19            | 0.0879                              | <b>0.0032</b>                     | <b>0.0368</b>                        | <b>0.0014</b>                        |
| 20            | 0.0675                              | <b>0.0024</b>                     | 0.1068                               | <b>0.0069</b>                        |
| 21            | <b>0.0422</b>                       | <b>0.0003</b>                     | 0.2543                               | 0.1720                               |
| 22            | <b>0.0362</b>                       | <b>0.0005</b>                     | 0.3287                               | 0.2502                               |
| 23            | <b>0.0328</b>                       | <b>0.0010</b>                     | 0.4982                               | 0.3645                               |
| 24            | <b>0.0378</b>                       | <b>0.0001</b>                     | 0.3984                               | 0.4905                               |
| 25            | <b>0.0292</b>                       | <b>0.0001</b>                     | 0.4332                               | 0.6058                               |
| 26            | <b>0.0158</b>                       | <b>&lt; 0.0001</b>                | 0.3983                               | 0.8054                               |
| 27            | <b>0.0227</b>                       | <b>&lt; 0.0001</b>                | 0.3472                               | 0.7794                               |
| 28            | <b>0.0146</b>                       | <b>&lt; 0.0001</b>                | 0.5062                               | 0.9593                               |
| 35            | <b>0.0173</b>                       | <b>0.0017</b>                     | 0.9430                               | 0.7905                               |
| 42            | 0.0748                              | <b>0.0106</b>                     | 0.8946                               | 0.8382                               |
| 49            | 0.2117                              | 0.118848                          | 0.9004                               | 0.9142                               |
| 56            | 0.2569                              | 0.154605                          | 0.8423                               | 0.9054                               |

## Supplementary References

- 1 Wu, C.Y., Young, L., Young, D., Martel, J. & Young, J.D. Bions: a family of biomimetic mineralo-organic complexes derived from biological fluids. *PLoS One* **8**, e75501 (2013).
- 2 Smith, E.R., Hewitson, T.D., Hanssen, E. & Holt, S.G. Biochemical transformation of calciprotein particles in uraemia. *Bone* **110**, 355-367 (2018).
- 3 Vij, A. G. Effect of prolonged stay at high altitude on platelet aggregation and fibrinogen levels. *Platelets* **20**, 421-427, doi:10.1080/09537100903116516 (2009).
- 4 Suresh, M. V. *et al.* Hypoxia-Inducible Factor (HIF)-1 $\alpha$  Promotes Inflammation and Injury Following Aspiration-Induced Lung Injury in Mice. *Shock*, doi:10.1097/SHK.0000000000001312 (2018).
- 5 Rolfs, A., Kvietikova, I., Gassmann, M. & Wenger, R. H. Oxygen-regulated transferrin expression is mediated by hypoxia-inducible factor-1. *J Biol Chem* **272**, 20055-20062, doi:10.1074/jbc.272.32.20055 (1997).
- 6 Padhy, G., Sethy, N. K., Ganju, L. & Bhargava, K. Abundance of plasma antioxidant proteins confers tolerance to acute hypobaric hypoxia exposure. *High Alt Med Biol* **14**, 289-297, doi:10.1089/ham.2012.1095 (2013).
- 7 Tripathy, D. *et al.* Thrombin, a mediator of cerebrovascular inflammation in AD and hypoxia. *Front Aging Neurosci* **5**, 19, doi:10.3389/fnagi.2013.00019 (2013).
- 8 Wenger, R. H., Rolfs, A., Marti, H. H., Bauer, C. & Gassmann, M. Hypoxia, a novel inducer of acute phase gene expression in a human hepatoma cell line. *J Biol Chem* **270**, 27865-27870, doi:10.1074/jbc.270.46.27865 (1995).
- 9 Tan, F., Ghosh, S., Mosunjac, M., Mancini, E. & Ofori-Acquah, S. F. Original Research: Diametric effects of hypoxia on pathophysiology of sickle cell disease in a murine model. *Exp Biol Med (Maywood)* **241**, 766-771, doi:10.1177/1535370216642046 (2016).
- 10 Zhang, B. *et al.* Comparative transcriptomic and proteomic analyses provide insights into the key genes involved in high-altitude adaptation in the Tibetan pig. *Sci Rep* **7**, 3654, doi:10.1038/s41598-017-03976-3 (2017).
- 11 Le Jan, S. *et al.* Characterization of the expression of the hypoxia-induced genes neuritin, TXNIP and IGFBP3 in cancer. *FEBS Lett* **580**, 3395-3400, doi:10.1016/j.febslet.2006.05.011 (2006).
- 12 Wellmann, S. *et al.* Oxygen-regulated expression of the RNA-binding proteins RBM3 and CIRP by a HIF-1-independent mechanism. *J Cell Sci* **117**, 1785-1794, doi:10.1242/jcs.01026 (2004).
- 13 Zhang, Y., Wang, H., Zhang, J., Lv, J. & Huang, Y. Positive feedback loop and synergistic effects between hypoxia-inducible factor-2 $\alpha$  and stearoyl-CoA desaturase-1 promote tumorigenesis in clear cell renal cell carcinoma. *Cancer Sci* **104**, 416-422, doi:10.1111/cas.12108 (2013).
- 14 Hernández, C. *et al.* Induction of trefoil factor (TFF)1, TFF2 and TFF3 by hypoxia is mediated by hypoxia inducible factor-1: implications for gastric mucosal healing. *Br J Pharmacol* **156**, 262-272, doi:10.1111/j.1476-5381.2008.00044.x (2009).
- 15 Liangos, O. *et al.* Whole blood transcriptomics in cardiac surgery identifies a gene regulatory network connecting ischemia reperfusion with systemic inflammation. *PLoS One* **5**, e13658, doi:10.1371/journal.pone.0013658 (2010).
- 16 Saraf, S. L. *et al.* Progressive glomerular and tubular damage in sickle cell trait and sickle cell anemia mouse models. *Transl Res* **197**, 1-11, doi:10.1016/j.trsl.2018.01.007 (2018).

- 17 Kelly, K. J., Liu, Y., Zhang, J. & Dominguez, J. H. Renal C3 complement component: feed forward to diabetic kidney disease. *Am J Nephrol* **41**, 48-56, doi:10.1159/000371426 (2015).
- 18 Wagner, C. A. *et al.* Mouse model of type II Bartter's syndrome. II. Altered expression of renal sodium- and water-transporting proteins. *Am J Physiol Renal Physiol* **294**, F1373-1380, doi:10.1152/ajprenal.00613.2007 (2008).
- 19 Denecke, B. *et al.* Tissue distribution and activity testing suggest a similar but not identical function of fetuin-B and fetuin-A. *Biochem J* **376**, 135-145, doi:10.1042/BJ20030676 (2003).
- 20 Loffing, J. *et al.* Altered renal distal tubule structure and renal Na(+) and Ca(2+) handling in a mouse model for Gitelman's syndrome. *J Am Soc Nephrol* **15**, 2276-2288, doi:10.1097/01.ASN.0000138234.18569.63 (2004).
