# Supplementary material for: Fetuin-A is a HIF target that safeguards tissue integrity during hypoxic stress
Source: PubMed Central journal article supplement (PMC7822914; doi:10.1038/s41467-020-20832-7), 2021-01-22
Supplement: 41467_2020_20832_MOESM3_ESM.pdf [file 41467_2020_20832_MOESM3_ESM.pdf]

### **Description of Additional Supplementary Files**

File Name: Supplementary Movie 1

Description: Z-stacks of a normoxic E18.5 kidney iDisco stained for nephrin.

File Name: Supplementary Movie 2

Description: Z-stacks of a hypoxic E18.5 kidney iDisco stained for nephrin.
